# Supplementary material for: A biophysical approach using drought stress factor for daily estimations ofevapotranspiration and CO 2 uptake in high-energy water-limitedenvironments
Source: Copernicus journal article supplement (doi:10.5194/bg-2017-204), 2017-05-23
Supplement: Supplementary file [file bg-2017-204-AC4-supplement.pdf]

Deleted: approach

Deleted: using drought stress factor

**A remote sensing-based biophysical model for daily estimations of  
evapotranspiration and CO<sub>2</sub> uptake in high-energy water-limited  
environments**

David Helman<sup>1,2,\*</sup>, Itamar M Lensky<sup>1</sup>, Yagil Osem<sup>3</sup>, Shani Rohatyn<sup>4</sup>, Eyal Rotenberg<sup>4</sup> and Dan  
Yakir<sup>4</sup>

<sup>1</sup> Department of Geography and Environment, Bar Ilan University, Ramat Gan 52900, Israel

<sup>2</sup> Department of Geography, University of Cambridge, Cambridge, CB2 3EN, UK

<sup>3</sup> Department of Natural Resources, Agricultural Research Organization, Volcani Center, Bet  
Dagan 50250, Israel

<sup>4</sup> Earth and Planetary Sciences, Weizmann Institute of Science, Rehovot 76100, Israel

\*Corresponding author:

David Helman ([dh565@cam.ac.uk](mailto:dh565@cam.ac.uk) ; [davidhelman.biu@gmail.com](mailto:davidhelman.biu@gmail.com))

Department of Geography, Bar-Ilan University, Ramat Gan 52900  
Israel.

Tel: +972 3 5318342

Fax: +972 3 5344430

## Abstract

28

29 Estimations of ecosystem-level evapotranspiration (ET) and CO<sub>2</sub> uptake in water-limited  
30 environments are scarce and scaling up ground-level measurements is not straightforward. A

31 biophysical approach using remote sensing (RS) and meteorological data (RS-Met) is  
32 adjusted to extreme high-energy water-limited ecosystems that suffer from continuous stress  
33 conditions to provide daily estimations of ET and CO<sub>2</sub>-uptake (measured as gross primary  
34 production – GPP) at a spatial resolution of 250-m. The RS-Met was adjusted using a  
35 seasonal water deficit factor ( $f_{WD}$ ) based on daily rainfall, temperature and radiation data. We  
36 validated our adjusted RS-Met with eddy-covariance flux measurements using a newly  
37 developed mobile lab system and the single active Fluxnet station operating in this region  
38 (Yatir pine forest station) in a total of seven forest and non-forest sites across a climatic  
39 transect in Israel (280-770 mm y<sup>-1</sup>). RS-Met was also compared to the satellite-borne  
40 Moderate Resolution Imaging Spectroradiometer (MODIS)-based ET and GPP products  
41 (MOD16 and MOD17, respectively) in these sites.

42 Results show that the inclusion of the  $f_{WD}$  significantly improved the model, with  $R=0.64-$   
43  $0.91$  for the ET adjusted model (compared to  $0.05-0.80$  of the non-adjusted model) and  
44  $R=0.72-0.92$  for the adjusted GPP model (compared to  $R=0.56-0.90$  of the non-adjusted  
45 model). The RS-Met (with the  $f_{WD}$ ) successfully tracked observed changes in ET and GPP  
46 between dry and wet seasons across the sites. ET and GPP estimates from the adjusted RS-  
47 Met also agreed well with eddy covariance estimates at the annual timescale in the Fluxnet  
48 station of Yatir ( $266\pm 61$  vs.  $257\pm 58$  mm y<sup>-1</sup> and  $765\pm 112$  vs.  $748\pm 124$  gC m<sup>-2</sup> y<sup>-1</sup> for ET and  
49 GPP, respectively). Comparison with MODIS products showed consistently lower estimates  
50 from the MODIS-based models, particularly at the forest sites. Using the adjusted RS-Met,  
51 we show that afforestation significantly increased the water use efficiency (the ratio of carbon  
52 uptake to ET) in this region, with the positive effect decreasing when moving from dry to  
53 more humid environments, strengthening the importance of drylands afforestation. This  
54 simple but yet robust biophysical approach shows a promise for reliable ecosystem-level  
55 estimations of ET and CO<sub>2</sub> uptake in extreme high-energy water-limited environments.

56

57 **Keywords:** CO<sub>2</sub>; ET; GPP; MODIS; NDVI; water deficit; water stress

**Deleted:** was previously proposed for ecosystem-level assessment relying on vegetation index and meteorological data (RS-Met) in temperate Mediterranean ecosystems. However, these RS-Met models have not been tested yet in extreme high-energy water-limited ecosystems that suffer from continuous stress conditions. Owing to the lack of ET and CO<sub>2</sub> flux estimations in the Eastern Mediterranean, we examined the RS-Met approach using

**Moved (insertion) [2]**

**Deleted:** .

**Deleted:** ,

**Moved up [2]:** in seven forest and non-forest sites across a climatic transect in Israel (280-770 mm y<sup>-1</sup>).

**Deleted:** The RS-Met models were used with and without the addition of a seasonal drought stress factor ( $f_{DS}$ ), which was based on daily rainfall, temperature and radiation data.

**Deleted:** the RS-Met models with the inclusion of the  $f_{DS}$  were

**Deleted:** compared to the non- $f_{DS}$  models (

**Deleted:** r

**Deleted:** ;

**Deleted:**  $P=0.06$  and r

**Deleted:** r

**Deleted:** ;

**Deleted:**  $P<0.01$  for ET and GPP, respectively)

**Deleted:** These

**Deleted:** ,

**Deleted:** seasonal

**Deleted:** ( $ET_{MOD} = 0.94 \times ET_{EC} + 0.28$ ;  $r=0.82$ ;  $MAE=0.54$  mm d<sup>-1</sup>;  $N=243$  d, and  $GPP_{MOD} = 0.99 \times GPP_{EC} + 0.51$ ;  $r=0.86$ ;  $MAE=1.03$  gC m<sup>-2</sup> d<sup>-1</sup>;  $N=252$  d)

**Deleted:** Modeled

**Deleted:** located in the dryland pine forest

**Deleted:** Using the RS-Met models, we were able to show the effect of afforestation on water vapor and CO<sub>2</sub> fluxes in this region. A

**Deleted:** was responsible for a

**Deleted:** in

**Deleted:** WUE

**Deleted:** This

**Deleted:** when adjusting for drought stress effects

**Deleted:** drought stress;

Assessing the water use and carbon uptake in terrestrial ecosystems is important for monitoring biosphere responses to climate change (Ciais et al., 2005; Jung et al., 2010; Reichstein et al., 2013). Accurate estimations of evapotranspiration (ET) and gross primary production (GPP), as a measure of the CO<sub>2</sub> uptake, usually require the integration of extensive meteorological, flux and field-based data (e.g., Wang et al., 2014; Kool et al., 2014). However, scaling up field-based measurements to the ecosystem level is not straightforward and require the use of complex models (Way et al., 2015).

Currently, the eddy covariance (EC) technique is the most direct method for measuring carbon and water vapor fluxes at the ecosystem level (Baldocchi, 2003). The EC approach benefits from continuous temporal coverage; currently (April, 2017), there are more than 560 active EC sites across the globe, as part of the Fluxnet program (<http://fluxnet.ornl.gov>). However, there are also some practical and technical limitations. The EC measurement is representative of a relatively small area (<2 km<sup>2</sup>), and the application of the EC approach is limited to relatively homogeneous and flat terrains. Additionally, most EC towers are concentrated in the US, Europe and Asia, with poor coverage in water-limited regions, such as North Africa and the Eastern Mediterranean (Schimel et al., 2015).

Remote-sensing-based models (RS models) have been used to overcome some of the limitations of EC, complementing the information derived from the flux towers. In contrast to process-driven models, RS models benefit from continuous, direct observation of the Earth's surface, acquiring data at a relatively high spatial resolution and with full regional to global coverage. Many RS models for the estimation of ET and GPP exist (see review in Kalma et al., 2008), but these algorithms are too complex and most of the models are not provided as accessible products for researchers outside the remote sensing community. Particular exceptions are the satellite-borne Moderate Resolution Imaging Spectroradiometer (MODIS)-based ET and GPP products (MOD16 and MOD17), which provide 8-day ET and GPP estimates at 1-km for 2000-2015, globally (Mu et al., 2007, 2011, Running et al., 2000, 2004).

In the past decade, several simple biophysical ET and GPP models based on vegetation indices (from satellite data) have emerged, offering assessment at a relatively high-to-moderate spatial and temporal resolutions with an acceptable accuracy (i.e. daily estimates at 250 m; see e.g. Veroustraete et al., 2002; Sims et al., 2008; Maselli et al., 2009, 2014; and

Deleted: of the utmost

Deleted: cc

Deleted: Measurements of leaf gas exchange and isotopic composition (e.g.,  $\delta^{13}\text{C}$  and  $\delta^{18}\text{O}$ ) have been used to estimate leaf-scale carbon and water fluxes (Klein et al., 2013; Maseyk et al., 2011; Raz-Yaseef et al., 2012a). Meanwhile, observations of sap flow and tree rings often serve to estimate fluxes at the tree-level (Klein et al., 2016; Wang et al., 2014).

Deleted: such

Deleted: most of them

Deleted: , with low accessibility

143 review of ET models in Glenn *et al.*, 2010). One of those models is the ET model based on  
 144 the FAO-56 formulation (Allen *et al.*, 1998). The FAO-56 formulation states that the actual  
 145 ET of irrigated crops can be determined from the reference ET ( $ET_0$ ) corrected with crop  
 146 coefficient  $K_c$  values (see Eq. 2). The  $K_c$  varies mainly with specific plant species  
 147 characteristics, which enables the transfer of standard  $K_c$  values among locations and  
 148 environments (Allen *et al.*, 2006).  
 149 The remote-sensing version of this formulation uses a function of satellite-derived vegetation  
 150 index, usually the normalized difference vegetation index (NDVI), as a substitute for the crop  
 151 coefficient. Being a measure of the green plant biomass and the ecosystem leaf area, the  
 152 NDVI is often used as a surrogate for plant transpiration and rainfall interception capacity  
 153 (Glenn *et al.*, 2010). Additionally, the NDVI is closely related to the radiation absorbed by  
 154 the plant and to its photosynthetic capacity (Gamon *et al.*, 1995). However, the direct  
 155 detection, through NDVI, of the abovementioned parameters at a seasonal timescale is still  
 156 challenging and usually requires additional meteorological information (Helman *et al.*,  
 157 2015a). The RS model based on the FAO-56 formulation combines the two sources of  
 158 information, satellite and meteorological, providing a daily estimation of actual ET. This  
 159 model, originally proposed for croplands and other managed vegetation systems (Allen *et al.*,  
 160 1998; Glenn *et al.*, 2010), was recently adjusted for applications in natural vegetation systems  
 161 (Maselli *et al.*, 2014).  
 162 For the estimation of GPP, a simple but robust biophysical GPP model is the one based on  
 163 the radiation use efficiency (RUE) model proposed by Monteith (1977). The classical  
 164 Monteith-type model depends on the absorbed radiation and on the efficiency of the  
 165 vegetation at converting this radiation into carbon-based compounds. Accordingly, this  
 166 Monteith-based model is driven by radiation and temperature data, acquired from  
 167 meteorological stations, and by the fraction of absorbed photosynthetically active radiation  
 168 ( $fAPAR$ ), which can be calculated from the satellite-derived NDVI or EVI. A major  
 169 challenge in this model, however, is the estimation of the RUE, a key component of the  
 170 model, which usually depends on plant species type and environmental conditions. Currently,  
 171 the conventional procedure is to use a plant-species-dependent maximum RUE from a lookup  
 172 table and adjust it for seasonal changes using some sort of a factor that changes throughout  
 173 the season based on meteorological data (Running *et al.*, 2004; Zhao and Running, 2010).  
 174 Though simple, both ET and GPP models (hereafter RS-Met) were shown to be promising in  
 175 accurately assessing daily ET and GPP at a relatively high spatial resolution (<1 km)

Deleted: see also the

Deleted: (Allen *et al.*, 1998

Deleted: This

Deleted: model

Deleted: , which is defined as the ratio of the actual to the potential ET ( $ET_0$ ) in the FAO-56 formulation

Deleted: by

Formatted: Font:Not Italic, Complex Script Font: Italic

Deleted: models

184 (Helman et al., 2017; Maselli et al., 2014, 2006; Veroustraete et al., 2002). However, the use  
 185 of the RS-Met is limited to ecosystems under normally non-stressful conditions because there  
 186 is no accurate representation of water availability in these models. Recently, the  
 187 incorporation of a water-deficit factor ( $f_{WD}$ ) in these models was proposed by Maselli *et al.*,  
 188 (2009, 2014), adjusting for short-term stress conditions in water-limited natural ecosystems.  
 189 The proposed  $f_{WD}$  is based only on daily rainfall data and daily potential ET calculated from  
 190 temperature and/or incoming radiation. The RS-Met with the addition of the  $f_{WD}$  was  
 191 successfully validated against EC-derived estimates of ET and GPP in several sites in Italy  
 192 (Maselli et al., 2014, 2009, 2006).

Deleted: models

Deleted: drought

Deleted: stress

Deleted:  $f_{DS}$

Deleted:  $f_{DS}$

Deleted: models

Deleted:  $f_{DS}$

Deleted: were

193 However, the RS-Met approach has never been tested in extreme high-energy water-limited  
 194 environments such as those in the Eastern Mediterranean. Currently, there is only one active  
 195 Fluxnet station in the entire Eastern Mediterranean (Yatir forest, southern Israel; Fig. 1a) that  
 196 measures water vapor and carbon fluxes (since 2000); while in this region water is considered  
 197 to be a valuable resource and the proper management of this resource depends on the accurate  
 198 assessment of the ET component. Moreover, despite of the well-known important  
 199 contribution of drylands regions to the global  $CO_2$  (Ahlström et al., 2015), there are almost  
 200 no efforts of estimating  $CO_2$  fluxes in forested and non-forested areas in this dry region. This  
 201 led to the development of the Weizmann mobile lab system (Israel; Fig. 1h) that allows  
 202 extension of the permanent Fluxnet measurement sites on campaign basis (e.g., Asaf *et al.*,  
 203 2013; for technical detail see: <http://www.weizmann.ac.il/EPS/Yakir/node/321>). Such a  
 204 system could allow flux and auxiliary analytical measurements across a range of climatic  
 205 conditions, plant species and ecosystems, as well as addressing land use changes and  
 206 disturbance. However, to extend these campaign-based measurements in time and space a  
 207 model fitted to the high-energy water-limited conditions of this region is required.

Deleted: this

208 Here, we adjusted the RS-Met to the extreme hot and dry conditions of the Eastern  
 209 Mediterranean region. The adjusted RS-Met was examined in a total of seven ecosystems  
 210 distributed at three precipitation levels along a rainfall gradient (280-770 mm  $y^{-1}$ ) in this  
 211 region (Israel; Fig. 1). Ecosystems included three pairs of planted forests and adjacent non-  
 212 forest sites (representing the original area on which these forests were planted). Ground-level  
 213 campaign measurements of ET and net ecosystem  $CO_2$  exchange using the newly developed  
 214 mobile lab (Fig. 1h) and the continuous flux measurements in the active Fluxnet site in Yatir  
 215 (Klein et al., 2016; Tatarinov et al., 2016) were used to validate the RS-Met. This  
 216 combination of model-based estimates and direct flux measurements of ET and  $CO_2$  uptake

Deleted: tested

Deleted: approach

Deleted: the Eastern Mediterranean

Deleted: models

230 across a range of climatic conditions and ecosystems provides a unique opportunity to test  
 231 and validate the RS-Met approach in this high-energy water-limited region. Particularly, we  
 232 examined the RS-Met with and without the application of the  $f_{WD}$ . We also compared the RS-  
 233 Met with MODIS ET/GPP products in the studied sites.  
 234 Our specific goals in this study were to: (1) examine the seasonal evolution of the  $f_{WD}$  and its  
 235 role in the RS-Met, (2) compare the model estimates with EC and MODIS ET/GPP products  
 236 across these high-energy water-limited sites, at a daily and annual basis, and (3) use the RS-  
 237 Met to estimate changes in water use efficiency ( $WUE=GPP/ET$ ) following afforestation  
 238 across the rainfall gradient in Israel, by comparing the three-paired forest vs. non-forest sites.

239

## 240 2. Materials and methods

### 241 2.1. Study sites

242 The sites in this study included three pairs of planted pine forests (*Pinus halepensis* Mill.)  
 243 and adjacent non-forested (dwarf shrublands) sites distributed throughout a climatic range in  
 244 Israel ( $P = 280 - 770 \text{ mm y}^{-1}$ ), from dry to sub-humid Mediterranean (Table 1 and Fig. 1a-f),  
 245 which represent the typical Mediterranean vegetation systems in the Eastern Mediterranean.  
 246 The three non-forested sites represent the original natural environment on which the pine  
 247 forests were planted, while the afforested sites are currently managed by the Jewish National  
 248 Fund (KKL). The non-forested shrubland sites are mostly dominated by *Sarcopoterium*  
 249 *spinosum* (dwarf shrub) in a patchy distribution with a wide variety of herbaceous species,  
 250 mostly annuals, growing in between the shrub patches during winter to early spring. In  
 251 addition, we tested the models in one native deciduous forest site dominated by *Quercus*  
 252 species. A brief description of the sites is given in the following:

253 *Yatir*. The forest of Yatir is an Aleppo pine forest (*Pinus halepensis*) that was planted by  
 254 KKL mostly during 1964-1969 in the semiarid region of Israel (31.34N, 35.05E; Fig. 1a). It  
 255 covers a total area of c. 2800 ha and lies on a predominantly light brown Rendzinas soil ( $79 \pm$   
 256  $45.7 \text{ cm}$  deep), overlying a chalk and limestone bedrock (Llusia et al., 2016). The average  
 257 elevation is 650 m. The mean annual rainfall in the forest area is  $285 \text{ mm y}^{-1}$  (for the last 40  
 258 years) and was  $279 \text{ mm y}^{-1}$  in the Fluxnet site during 2001-2015 (Table 1). The mean annual  
 259 temperature in Yatir is  $18.2^\circ\text{C}$  with 13 and  $31^\circ\text{C}$  for mean winter (November– January) and  
 260 summer (May–July) temperatures, respectively. Tree density in Yatir is c.  $300 \text{ trees ha}^{-1}$   
 261 (Rotenberg and Yakir, 2011) with a tree average height of c. 10 m and canopy leaf area index

|                                                                                                                   |
|-------------------------------------------------------------------------------------------------------------------|
| Deleted: models                                                                                                   |
| Deleted: $f_{DS}$                                                                                                 |
| Deleted: , which was originally proposed by Maselli <i>et al.</i> (2014) for temperate Mediterranean environments |
| Deleted: Thus, o                                                                                                  |
| Deleted: $f_{DS}$                                                                                                 |
| Deleted: estimation of the fluxes from the                                                                        |
| Deleted: models in these environments                                                                             |
| Deleted: measurements                                                                                             |
| Deleted: scale                                                                                                    |
| Deleted: , with and without the use of the $f_{DS}$                                                               |
| Deleted: best                                                                                                     |
| Deleted: models                                                                                                   |

(LAI) of  $1.4 \pm 0.4 \text{ m}^2 \text{ m}^{-2}$ , which displays small fluctuations between winter and summer (Sprintsin et al., 2011). The understory in this forest is mostly comprised of ephemeral herbaceous species (*i.e.*, therophytes, geophytes and hemicryptophytes) growing during the wet season (September-April) and drying out in the beginning of the dry season (May-June). A relatively thin needle litter layer covers the forest floor during the needle senescence period (June-August) (Maseyk et al., 2008).

*Eshtaol*. The forest of Eshtaol was planted in the late 1950's by KKL with mostly *P. halepensis* trees in the central part of Israel (31.79N, 34.99E; Fig. 1c). The current forest area is c. 1200 ha and lies mainly on Rendzinas soils. The average elevation is 330 m. The mean annual rainfall in this area is c. 500 mm  $\text{y}^{-1}$  and was a 480 mm  $\text{y}^{-1}$  in the site of the EC measurements during 2012-2015 (Table 1). Tree density in Eshtaol is typically 300–350 trees  $\text{ha}^{-1}$ , with a tree canopy LAI that ranges between  $1.9 \text{ m}^2 \text{ m}^{-2}$  and  $2.6 \text{ m}^2 \text{ m}^{-2}$  and a tree average height of 12.5 m (Osem et al., 2012).

*Birya*. The forest of Birya is a *P. halepensis* forest that was mostly planted during the early 1950's in the northern part of Israel, Galilee region (33.00N, 35.48E; Fig. 1e). The forest covers an area of c. 2100 ha and lies on a Rendzinas and Terra rossa soils. The average elevation is 730 m. The average temperature in this area is 16°C, with an average annual rainfall of 710 mm  $\text{y}^{-1}$  and 776 mm  $\text{y}^{-1}$  during the years of the EC measurements (2012-2015; Table 1). The average stand density is 375 trees  $\text{ha}^{-1}$  with an average tree height of 11 m (Llusia et al., 2016).

*HaSolelim*. The HaSolelim forest is a native deciduous mixed oak forest dominated by *Quercus ithaburensis*, which is accompanied by *Quercus calliprinos* (evergreen) and few other Mediterranean broadleaved tree and shrub species (Fig. 1g). The forest is located at the northern part of Israel in the Galilee region, 30 km south of the Birya forest (32.74N, 35.23E). The forest covers an area of c. 240 ha and lies on Rendzinas and Terra rossa soils. The elevation in the site of the EC measurements is 180 m (Table 1). The average temperature in this area is a typically 21°C, with a mean annual rainfall of 580 mm  $\text{y}^{-1}$  and 543 mm during the years of the EC measurements. The site where the measurements took place is characterized by an average stand density of 280 trees  $\text{ha}^{-1}$  and an average tree height of 8 m (Llusia et al., 2016).

*Wady Attir*. This is a xeric shrubland site located southwest to the forest of Yatir (31.33N, 34.99E). The average elevation is 490 m. The site is dominated by semi-shrubs species such

307 as, *Phagnalon rupestre* L., with *graminae* species, mainly *Stipa capensis* L. (also known as  
 308 Mediterranean needle grass), *Hordeum spontaneum* K. Koc. (also known as wild barley) and  
 309 some *Avena* species such as, *A. barbata* L. and *A. sterilis* L., appearing shortly after the rainy  
 310 season (Leu et al. 2014; Fig. 1b). The mean annual rainfall in this area is 230 mm y<sup>-1</sup>  
 311 (Mussery et al., 2016) and was 280 mm y<sup>-1</sup> in the years of the EC measurements (2012-2015;  
 312 Table 1).

313 *Modiin*. The shrubland site of Modiin is located few kilometers from the forest site of Eshtaol  
 314 and represent the original environment on which this forest was planted (31.87N, 35.01E;  
 315 Fig. 1d). The average elevation is 245 m. The shrubland site is mostly dominated by  
 316 *Sarcopoterium spinosum* (dwarf shrub) in a patchy distribution with a wide variety of  
 317 herbaceous species, mostly annuals, growing in between the shrub patches during winter to  
 318 early spring. The average rainfall amount in this area was 480 mm y<sup>-1</sup> in the years of the EC  
 319 measurements (Table 1).

320 *Kadita*. The shrubland site of Kadita is also dominated by *Sarcopoterium spinosum* (dwarf  
 321 shrub) in a typical patchy distribution (Fig. 1f). It is located nearby the forest of Biryat an  
 322 elevation of 815 m (33.01N, 35.46E; Table 1). The mean annual rainfall in this site is similar  
 323 to that recorded in the Biryat forest (i.e., 766 mm y<sup>-1</sup> in the years of study).

324 All shrubland sites have been under continuous livestock grazing for many years, and their  
 325 vegetation structures are mainly the outcome of both rainfall amount and grazing regime.

## 326 2.2. Satellite-derived vegetation index

327 We used the NDVI from the moderate-resolution imaging spectroradiometer (MODIS) on  
 328 board NASA's Terra satellite at 250 m spatial resolution (MOD13Q1). The MOD13Q1  
 329 NDVI product is a composite of a single day's value selected from 16-day periods based on  
 330 the maximum value criteria (Huete et al., 2002). The Terra's NDVI product is acquired  
 331 during the morning (10:30 am) and thus provides a good representation of the peak time of  
 332 the plants' diurnal activity. The gradual growth of the vegetation enables the interpolation of  
 333 the 16-day NDVI time series to representative daily values (Glenn et al., 2008; Maselli et al.,  
 334 2014). We downloaded the 16-day NDVI time series covering the main area of the eddy  
 335 covariance flux measurement for each site from the MODIS Subsets  
 336 ([http://daacmodis.ornl.gov/cgi-](http://daacmodis.ornl.gov/cgi-bin/MODIS/GLBVIZ_1_Glb/modis_subset_order_global_col5.pl)  
 337 [bin/MODIS/GLBVIZ\\_1\\_Glb/modis\\_subset\\_order\\_global\\_col5.pl](http://daacmodis.ornl.gov/cgi-bin/MODIS/GLBVIZ_1_Glb/modis_subset_order_global_col5.pl)) for the period October  
 338 2001 – October 2015. Then, we pre-processed the NDVI time series as described in Helman



et al. (2014a, 2014b, 2015b) to remove outliers and uncertainties due to cloud contamination and atmospheric disturbances without removing important information (see Fig. S2). The processed 16-day NDVI time series were then interpolated on a daily basis using the local scatterplot smoothing technique (LOESS). This technique is suited for eliminating outliers in non-parametric time series and has been shown to be a useful tool in the interpolation of datasets with a seasonal component (Cleveland, 1979).

### 2.3. The mobile lab system and the Fluxnet station in Yatir

A newly designed mobile flux measurement system was used in all campaigns (Fig. 1h), based on the 28-m pneumatic mast on a 12-ton 4x4 truck that included a laboratory providing an air-conditioned instrument facility (cellular communication, 18 KVA generator, 4200 WUPS). Flux, meteorological and radiation measurements relied on an eddy-covariance system that provides CO<sub>2</sub> measurements and sensible and latent heat fluxes using a three-dimensional sonic anemometer (R3, Gill Instruments, Lymington, Hampshire, UK) and enclosed-path CO<sub>2</sub>-H<sub>2</sub>O IRGA (Licor 7200, Li-Cor, Lincoln, NE, USA) using CarboEuroFlux methodology (Aubinet et al., 2000), and EddyPro Software ([www.licor.com](http://www.licor.com)). Data were collected using self-designed program in LabVIEW software. Air temperature and relative humidity (HMP45C probes, Campbell Scientific) and air pressure (Campbell Scientific sensors) were measured at 3 m above the canopy. Energy fluxes relied on radiation sensors, including solar radiation (CMP21, Kipp and Zonen), long-wave radiation (CRG4, Kipp and Zonen) and photosynthetic radiation (PAR, PAR-LITE2) sensors. All sensors were installed in pairs facing both up and down and are connected using the differential mode through a multiplexer to a data logger (Campbell Scientific). GPP for each site was calculated from the measured net ecosystem CO<sub>2</sub> exchange (NEE) after estimating ecosystem respiration, Re, and using the regression of NEE on turbulent nights against temperature, followed by extrapolating the derived night-time Re-temperature relationship to daytime periods (Reichstein *et al.*, 2005; modified for our region by Afik, 2009). Flux measurements with the mobile system were carried out on a campaign basis, in six of the seven sites, with each campaign representing approximately two weeks in a single site, repeated along the seasonal cycle with mostly two but sometimes only one two-weeks set of measurements per cycle, during the 4 years of measurements, 2012-2015. Continuous flux measurements were carried out in the permanent Fluxnet site of Yatir (xeric forest site). Begun in 2000, the eddy covariance (EC) and supplementary meteorological measurements have been conducted continuously (Rotenberg and Yakir, 2011; Tatarinov et al., 2016), with measurements

Deleted: estimated

Deleted: using the conventional approach of

Deleted: a

375 performed according to the Euroflux methodology. Instrumentation is similar to that in the  
376 Mobile Lab except for the use of a closed-path CO<sub>2</sub>/H<sub>2</sub>O infrared gas analyzer (IRGA, LI-  
377 7000; Li-Cor, Lincoln, NE) with the inlet placed 18.7 m above ground. Typical fetch  
378 providing 70% (cumulative) contribution to turbulent fluxes was measured between 100 m  
379 and 250 m (depending on the site) along the wind distance. This was taken in consideration  
380 when using the MOD13Q1 product to derive the modeled fluxes.

381 During April 2012, at the peak activity season in Yatir forest, the mobile lab system for two  
382 weeks deployed at 10 m distance away from the permanent flux measurements tower, were  
383 both EC systems measuring at the same height and fluxes calculated by the same software  
384 (EddyPro 3.0 version; Li-Cor, USA). The linear correlation ( $R^2$ ) and the slope of the Mobile  
385 Lab measured fluxes of H, LE and NEE vs. the permanent Tower fluxes were 0.9 and 1.0 for  
386 H, 0.8 and 0.9 for LE and 0.9 and 1 for NEE, respectively.

387 Daily estimates of reference evapotranspiration, i.e. ET<sub>o</sub> (in mm d<sup>-1</sup>), for the ET model, the  
388 water deficit and the water availability factors, were calculated from the mean daily air  
389 temperature and the daily total incoming solar radiation, measured at the seven sites  
390 following the empirical formulation proposed by Jensen & Haise (1963):

391 
$$ET_o = \frac{R_g}{2470} (0.078 + 0.0252 T) \quad (1)$$

392 where T is the mean daily air temperature (in °C), and R<sub>g</sub> is the daily global (total) incoming  
393 solar radiation (in kJ m<sup>-2</sup> d<sup>-1</sup>); ET<sub>o</sub> is finally converted into mm d<sup>-1</sup> by dividing the R<sub>g</sub> by 2470  
394 mm kJ m<sup>-2</sup> d<sup>-1</sup> (see in Jensen & Haise, 1963). We decided to use this ET<sub>o</sub> formulation of  
395 Jensen & Haise (1963) to be consistent with the original RS-Met proposed by Maselli et al.  
396 (2014) though we are aware of the large tradition of works devoted to compare several  
397 methods to estimate ET<sub>o</sub>, and to prove the validity and limitations of these methods under  
398 different environmental conditions.

399 2.4. MODIS ET/GPP products and the PaVI-E model for annual ET

400 We compared our RS-Met with the products from MODIS-based ET and GPP models, which  
401 details of these models can be found in Mu et al. (2007, 2011) and Running et al. (2000,  
402 2004) for the ET and GPP models, respectively. These products (MOD16 and MOD17 for  
403 ET and GPP, respectively) provide 8-day ET and GPP estimates at 1-km for 2000-2015,  
404 globally. MODIS ET/GPP products were compared with RS-Met at the seasonal and annual  
405 scale in all sites. Importantly, these MODIS products take advantage of the use of vapor

Deleted: potential

Deleted: drought

Deleted: stress

Deleted: factor

Deleted: The

pressure information, which was shown to affect the stomatal conductance of plants whereas our model did not consider this factor directly. We did not use vapor pressure data in the RS-Met because most of the weather stations in this region do not have such information and that would have limited the use of our model. However, the  $f_{WD}$  calculated from radiation, temperature and water supply (rainfall) data, is used in the adjusted RS-Met as an indirect proxy for VPD. To compare with the 8-day MODIS ET/GPP products we averaged the daily RS-Met and EC estimates over the same 8-day periods.

We also compared the RS-Met ET estimates to the annual ET derived from PaVI-E (Parameterization of Vegetation Index for the estimation of ET model; Helman et al., 2015a), at the six sites on an annual basis. The PaVI-E is an empirical model based on simple exponential relationships found between MODIS-derived EVI (and NDVI) and annual ET estimates from EC in 16 Fluxnet sites, comprising a wide range of plant functional types across Mediterranean-climate regions. This simple relationship (PaVI-E) was shown to produce accurate ET estimates at the annual timescale ( $\text{mm y}^{-1}$ ) and at a moderate spatial resolution of 250 m in this region (Helman et al., 2015a). It was validated against physical-based models (MOD16 and MSG LSA-SAF ETa) and ET calculated from water balances across the same study area. PaVI-E was used for ecohydrological studies in this region, providing insights into the role of climate in altering forest water and carbon cycles (Helman et al., 2017, 2016). The advantage of this model, is that it does not require any additional meteorological information but is a proper function of the relationship between observed fluxes and satellite-derived vegetation indices. This makes it interesting to compare with the RS-Met model since the RS-Met is highly dependent on meteorological forcing.

- Deleted: used
- Deleted: the
- Deleted: model
- Deleted: to validate the ET from the RS-Met model on an annual basis
- Deleted: owing to the lack of continuous flux measurements in
- Deleted: of the seven
- Deleted: (Eshtaol, HaSolelim, Biryia, Wady Attir, Modiin and Kadita, see Table 2 for N of the EC flux measurements in each of those sites)
- Deleted: the
- Deleted: measured
- Deleted: with
- Deleted: The PaVI-E model produces annual ET at a spatial resolution of 250 m and
- Deleted: retrieved
- Deleted: (Helman et al., 2015a)
- Deleted: It
- Deleted: shown to be useful
- Deleted: study
- Deleted: PaVI-E
- Deleted: alone

### 3. Description of the models and the use of a water deficit factor

The RS-Met models used here for the daily estimation of ET and GPP are based on the NDVI and the meteorological data. Each model was applied with and without a water deficit factor ( $f_{WD}$ ) adjustment (i.e., two model versions for ET and two for the GPP).

- Deleted: drought
- Deleted: stress
- Formatted: Space After: 12 pt
- Deleted: (Maselli et al., 2014, 2009, 2006; Veroustraete et al., 2002)
- Deleted: (DS)
- Deleted: (no-DS)
- Deleted: drought
- Deleted: stress
- Deleted: s
- Deleted: model

#### 3.1. The ET model

The RS-Met of daily ET is based on the FAO-56 formulation (Eq. 2):

$$ET = ET_0 \times (K_C + K_S) \quad (2)$$

Where  $K_C$  and  $K_S$  stand for the crop/canopy and soil coefficients, respectively (Allen et al., 1998). In the RS-Met a maximum value of  $K_C$  ( $K_{C\_max}$ ), which depends on the type of the monitored vegetation (Allen et al., 1998; Allen et al., 2006), and a maximum value of  $K_S$  ( $K_{S\_max}$ ), for soil evaporation, are used as a reference in the model. The  $K_{C\_max}$  and  $K_{S\_max}$  are then multiplied by a linear transformation of the NDVI (i.e.,  $f(NDVI)$  and  $f(1-NDVI)$ , respectively, [Maselli et al., 2014](#)) to adjust for the seasonal evolution of the crop/canopy and soil coefficients:

$$K_C = K_{C\_max} \times f(NDVI) \quad (3)$$

$$K_S = K_{S\_max} \times f(1-NDVI) \quad (4)$$

The linear transformation of the NDVI used here is the fractional vegetation cover ( $fVC$ ) that better represent both ET processes: direct soil evaporation and plant transpiration. The  $fVC$  is a classical two-end member function based on minimum and maximum values of NDVI, corresponding to a typical soil background without vegetation ( $NDVI_{SOIL}$ ) and an area fully covered by vegetation ( $NDVI_{VEG}$ ), respectively:

$$fVC = (NDVI - NDVI_{SOIL}) / (NDVI_{VEG} - NDVI_{SOIL}) \quad (5)$$

Thus, Eqs. (3) and (4) become:

$$K_C = K_{C\_max} \times fVC \quad (6)$$

and

$$K_S = K_{S\_max} \times (1 - fVC), \quad (7)$$

respectively.

The  $fVC$  in Eq. (5) is calculated on a daily basis from the interpolated NDVI (daily) data. Note that the  $fVC$  in Eq. (6) represents the fraction of the area covered by the vegetation, while in Eq. (7) the term  $1-fVC$  represents the fraction of the bare soil area. Both terms,  $fVC$  and  $1-fVC$  in Eqs. (6) and (7), change over the course of a year due to canopy development

Deleted: model

Deleted: Following Maselli *et al.* (2014), we

Deleted: to

512 and/or the appearance of ephemeral herbaceous plants. We used here the values of 0.1 and  
 513 0.8 for the  $NDVI_{SOIL}$  and  $NDVI_{VEG}$ , respectively, which are the values observed for bare  
 514 ground and dense natural vegetation in this region (Helman et al., 2015b).

515 Finally, from Eqs. (2) and (5-7) we obtain the model without the water deficit factor  
 516 adjustment (NO  $f_{WD}$ ):

$$518 \quad ET = ET_o \times \{[fVC \times K_{C\_max}] + [(1-fVC) \times K_{S\_max}]\} \quad (8)$$

519  
 520 Following, we used a water deficit ( $f_{WD}$ ) and water availability ( $f_{WA}$ ) factors to adjust the  
 521 crop/canopy and soil coefficients for water supply conditions at the root-zone and top-soil,  
 522 respectively, in Eqs. (6) and (7);

$$524 \quad K_C = K_{C\_max} \times fVC \times f_{WD} \quad (9)$$

525 and

$$528 \quad K_S = K_{S\_max} \times (1-fVC) \times f_{WA} \quad (10)$$

529  
 530 The  $f_{WD}$  and  $f_{WA}$  in Eqs. (9) and (10) simulate the effects of available water for plant  
 531 transpiration at the root zone and for surface evaporation at the top-soil, respectively, whereas  
 532 the  $f_{WD}$  is defined as follows:

$$534 \quad f_{WD} = 0.5 + 0.5 \times f_{WA} \quad (11)$$

535  
 536 The water availability factor ( $f_{WA}$ ) is calculated as the simple ratio between the daily rainfall  
 537 amount and the daily  $ET_o$ , both cumulated over a period of two months. Basically, the  
 538 accumulation period could vary for different ecosystem types and environmental conditions,  
 539 However, we have taken here a period of two months for the native shrublands and planted  
 540 (and native) forests following previous observations that showed that this period is sufficient  
 541 to maintain wet the topsoil layer for the whole rainy season in ecosystems in this region (Raz-  
 542 Yaseef et al. 2010; 2012). Furthermore, changing the accumulation period did not gave us a  
 543 consistently better results in all sites, as the two-month period gave us.

Deleted: as proposed in

Deleted: for this region

Deleted: drought stress

Deleted: no-

Deleted:  $f_{DS}$

Deleted: Maselli et al. (2014)

Deleted: drought stress

Deleted: factor

Deleted:  $f_{DS}$

Deleted: and the

Deleted: ( $f_{WA}$ )

Deleted: stressful

Deleted: , respectively

Deleted:  $f_{DS}$

Deleted:  $f_{DS}$

Deleted: drought

Deleted: stress

Deleted: and available water (or water shortage)

Deleted: for plant transpiration and bare soil evaporation

Deleted:  $f_{DS}$

Deleted: is

Deleted:  $f_{DS}$

Formatted: Space After: 6 pt

Deleted: (Maselli et al., 2014)

Moved (insertion) [1]

Deleted: Maselli et al. (2014) that suggested the use of a longer period (two months) for such ecosystems compared to the short period (one month) often used for annual crops.

Deleted: of

571 The  $f_{WA}$  is set to 1 when the cumulated rainfall amount exceeds the atmospheric demand (i.e.,  
572 the  $ET_0$ ). Note that the  $f_{WD}$  would then vary between 0.5 and 1, meaning that ET is reduced to  
573 half the potential maximum in the absence of water supply, simulating the basic transpiration  
574 levels maintained by evergreen vegetation (Glenn et al., 2011; Maselli et al. 2014). This  
575 reduction in the  $f_{WD}$  accounts for water deficit at the root zone, which results in reduced plant  
576 transpiration, while short-term effects would be mainly reflected through changes in the  
577 NDVI (and consequently in the  $fVC$  and  $fAPAR$ ; Glenn et al., 2010; Running and Nemani,  
578 1988). In contrast to the  $f_{WD}$ , the  $f_{WA}$  is reduced to zero following a dry period longer than  
579 two months, making the surface evaporation component null during the dry summer.  
580 The model is adjusted to root-zone and surface water deficit conditions ( $f_{WD}$  and  $f_{WA}$ ) by  
581 replacing Eqs. (6) and (7) by Eqs. (9) and (10);  
582  
583 
$$ET = ET_0 \times \{[fVC \times K_{C\_max} \times f_{WD}] + [(1-fVC) \times K_{S\_max} \times f_{WA}]\} \quad (12)$$
584  
585 Here we used a  $K_{C\_max}$  value of 0.7 for both forests and non-forest sites, and a  $K_{S\_max}$  value of  
586 0.2 for soil evaporation in both (adjusted and unadjusted for water deficit conditions) models,  
587 as in Maselli et al., (2014).  
588 Finally, the model derives daily ET estimates (in  $mm\ d^{-1}$ ) at the spatial resolution of the  
589 MODIS NDVI product, i.e., 250 m.

### 590 3.2. The GPP model

591 For the GPP model, we used the biophysical radiation use efficiency model proposed by  
592 Monteith (1977):

$$594 GPP = RUE \times fAPAR \times PAR \quad (13)$$

596 where PAR is the daily incident photosynthetic active radiation (in  $MJ\ m^{-2}$ ), calculated as  
597 45.7% from the incoming measured global solar radiation (Nagaraja Rao, 1984), and  $fAPAR$   
598 is the fraction of the PAR that is actually absorbed by the canopy (range from 0 to 1). The  
599  $fAPAR$  was derived here from the daily NDVI time series following the linear formulation:  
600  $fAPAR = 1.1638\ NDVI - 0.1426$ , which was proposed by Myneni & Williams (1994). This  
601 linear formulation was successfully applied in similar remote-sensing-based GPP models for  
602 similar ecosystems by Veroustraete *et al.* (2002), Maselli *et al.* (2006, 2009) and Helman *et*

Deleted: on

Deleted:  $f_{DS}$

**Moved up [1]:** Basically, the accumulation period could vary for different ecosystem types. However, we have taken here a period of two months for the native shrublands and planted (and native) forests following Maselli et al. (2014) that suggested the use of a longer period (two months) for such ecosystems compared to the short period (one month) often used for annual crops.

Deleted: DS

Deleted: Replacing

Deleted: the no-DS model (Eq. 8) becomes the following DS model

Deleted:  $f_{DS}$

Formatted: Space After: 6 pt

Deleted: DS and no-DS

Deleted: previously proposed by

Deleted: for similar woody-dominated ecosystems

Deleted: both

Deleted: the DS (Eq. 12) and no-DS (Eq. 8) models

Deleted:  $fPAR$

Deleted: following

Deleted: ),

Deleted: which

Deleted: and

627 *al. (2017)*; RUE is the radiation use efficiency (in g C MJ<sup>-1</sup>), which is the efficiency of the  
 628 plant for converting the absorbed radiation into carbon-based compounds and which changes  
 629 over the course of a year (Garbulsky et al., 2008).

630 The RUE is an important component in the GPP model and is the most challenging parameter  
 631 to compute. It is usually considered to be related to vapor pressure deficit, water availability,  
 632 temperature and plant species type (Running et al., 2000), and there have been several recent  
 633 efforts to directly relate it to the photochemical reflectance index (PRI), which can also be  
 634 derived from satellites (Garbulsky et al., 2014; Peñuelas et al., 2011; Wu et al., 2015).  
 635 Currently, the conventional modeling of RUE for Mediterranean ecosystems is not  
 636 straightforward and is mostly site specific, derived for specific local conditions (Garbulsky et  
 637 al., 2008). Here, we used the simple approach proposed by Veroustraete *et al.*, (2002) and  
 638 further developed by Maselli *et al.*, (2009), which states that a potential RUE (RUE<sub>MAX</sub> in g  
 639 C MJ<sup>-1</sup>) can be adjusted for seasonal changes using a function based on temperature and  
 640 water **deficit** conditions ( $f_{WT}$ ):

$$642 \text{ RUE} = \text{RUE}_{\text{MAX}} \times f_{\text{WT}} \quad (14)$$

643  
 644 The  $f_{WT}$  adjusts the RUE<sub>MAX</sub> for seasonal changes following changes in water availability and  
 645 temperature conditions:

$$647 f_{\text{WT}} = T_{\text{CORR}} \times f_{\text{WD}} \quad (15)$$

648  
 649 where  $T_{\text{CORR}}$  is a temperature correction factor calculated on a daily basis (Veroustraete et al.,  
 650 2002):

$$652 T_{\text{CORR}} = \frac{e^{(a - \frac{\Delta H_{AP}}{G \cdot T})}}{1 + e^{(\frac{\Delta S \cdot T - \Delta H_{DP}}{G \cdot T})}} \quad (16)$$

653  
 654 where  $a$  is a constant equal to 21.9;  $\Delta H_{AP}$  and  $\Delta H_{DP}$  are the activation and deactivation  
 655 energies (in J mol<sup>-1</sup>), equal to 52750 and 211, respectively;  $G$  is the gas constant, equal to  
 656 8.31 J K<sup>-1</sup> mol<sup>-1</sup>;  $\Delta S$  is the entropy of the denaturation of CO<sub>2</sub> and is equal to 710 J K<sup>-1</sup> mol<sup>-1</sup>;  
 657 and  $T$  is the mean daily air temperature (in Kelvin degrees); and  $f_{\text{WD}}$  is the same **water-deficit**  
 658 factor as in Eq. (11).

Deleted: stress

Deleted:  $f_{DS}$

Deleted:  $f_{DS}$

Deleted: drought

Deleted: stress

664 The ~~water deficit~~ factor,  $f_{WD}$ , is used here only in the model that considers ~~water supply~~  
 665 ~~conditions~~. Thus, in the model ~~without the  $f_{WD}$~~ , the  $f_{WT}$  would be only a function of the  
 666 temperature, and thus  $f_{WT} = T_{CORR}$  (in Eq. 15). Following Garbulsy *et al.*, (2008) and  
 667 Maselli *et al.*, (2009), a constant value of  $1.4 \text{ g C MJ}^{-1}$  was used here for  $RUE_{MAX}$  in all sites  
 668 and model ~~variations~~, (i.e., ~~with and without the  $f_{WD}$~~ ). The exclusion of direct measurements  
 669 of vapor pressure deficit (VPD) as an input in the model is indeed a limitation; however, we  
 670 tried to maintain a model with minimal input data that will be available from standard  
 671 weather stations (VPD information is currently lacking from most of the weather stations in  
 672 this region). The inclusion of the  $f_{WD}$ , which includes radiation, temperature and water supply  
 673 (rainfall) information is used as an indirect proxy for VPD in the model.

Deleted: drought stress  
 Deleted:  $f_{DS}$   
 Deleted: DS  
 Deleted: (i.e., the model  
 Deleted: drought  
 Deleted: stress  
 Deleted: )  
 Deleted: no-DS  
 Deleted: s  
 Deleted: the DS and no-DS

674 Finally, daily GPP values were computed from ~~the~~ model at a spatial resolution of 250 m for  
 675 each of the seven sites and compared with ~~EC estimates and the MODIS GPP product~~. It  
 676 should be stated that the use of the EC-derived GPP as a reference in the validation should be  
 677 taken with caution because GPP by itself is modeled and not directly measured. This may  
 678 introduce uncertainties to the validation that could be contaminated by self-correlation.

Deleted: both the DS and no-DS  
 Deleted: s,  
 Deleted: the  
 Deleted: measurements

#### 680 4. Testing the water deficit factor in high-energy water-limited environments

681 To show the importance of the ~~water deficit~~ factor ( $f_{WD}$ ) in ~~adjusting the model to~~ seasonal  
 682 variations in the fluxes, we demonstrate the seasonal evolution of ~~the  $f_{WD}$~~  together with that  
 683 of the main ~~drivers~~ of the RS-Met at the ~~dryland pine forest~~ site of Yatir (Fig. 2). Figure 2a  
 684 shows that the  $f_{WD}$  moderate the increase of  $K_C$  (blue line in middle panel of Fig. 2a) at the  
 685 beginning of the rainy season (~~November-January~~) even though the  $f_{VC}$  (green line in lower  
 686 panel of Fig. 2a) is relatively high ~~likely~~ due to the appearance of ephemeral herbaceous  
 687 vegetation in the ~~forest~~ understory (Helman *et al.*, 2015b). This is a realistic scheme since the  
 688 herbaceous vegetation has little contribution to the ecosystem fluxes but a significant  
 689 contribution to the NDVI (and thus to the  $f_{VC}$ ) signal (Helman, n.d.), ~~as observed by the low~~  
 690 ~~EC GPP at this time~~ (red dots in lower panel of Fig. 2a). Thus, the  $f_{WD}$  has an important role  
 691 in reducing the  $K_C$  to a more realistic low values at this stage of the year when there is less  
 692 water available for the trees. The same applies for the end of the rainy season ~~and summer~~, in  
 693 ~~May-August~~, when the  $ET_{0js}$  relatively high but there is almost no available water for ET, as  
 694 implied from the low  $f_{WD}$  (black line in upper panel of Fig. 2a).

Deleted: drought stress  
 Deleted:  $f_{DS}$   
 Deleted: tracking the  
 Deleted: at high-energy water-limited environments  
 Deleted:  $f_{DS}$   
 Deleted: components  
 Deleted: models  
 Deleted: one  
 Deleted: selective  
 Deleted:  $f_{DS}$   
 Deleted: in the forest site of Eshtaol  
 Deleted: October  
 Deleted: December  
 Deleted:  $f_{DS}$

695 In the GPP model, the  $f_{WD}$  reduces the high RUE at both ends of the rainy season, adjusting  
 696 the GPP to the ~~water deficit~~ conditions at the root-zone during these periods (Fig. 2b). Here

Deleted: (Fig. 2a)  
 Deleted: April  
 Deleted: May  
 Deleted: both  
 Deleted: and the  $f_{VC}$  are  
 Deleted:  $f_{DS}$   
 Deleted:  $f_{DS}$   
 Deleted: stress



again, the low  $f_{WD}$  reduces the contribution of the high  $fAPAR$  (and the RUE) in the model during the start of the rainy season due to the growth of ephemeral plants in the understory (green and blue lines in lower and middle panels of Fig. 2b, respectively). This is because there is still not sufficient water in the root-zone during this period. Particularly noted, though, is the significant reduction in GPP at the end of the rainy season and during the summer (May-August), when the PAR (yellow line in lower panel of Fig. 2b) is high but less water is available for transpiration and subsequently for photosynthesis.

Deleted: April  
Deleted: May  
Deleted: both  
Deleted: and the RUE are

## 5. Comparisons with MODIS and the Fluxnet station in Yatir

### 5.1. Daily ET and GPP

We compared the daily estimates of the modeled ET with MODIS ET/GPP products and the active Fluxnet station at the dryland pine forest of Yatir for 2002-2012 (Table 1). As expected from the noted above (Section 4), the model without the water deficit factor (NO  $f_{WD}$  in Fig. 3a and 3e) overestimated the ET in comparison to the eddy covariance measurements, particularly from mid spring to the end of the summer (Fig. 3a,e). The peak ET was shifted to late July – early September, while the ET measured from the eddy covariance showed an earlier peak, in March. The large overestimation of the model without the  $f_{WD}$  was associated with the high  $ET_0$  during the spring and summer ( $R=0.91$ ;  $P<0.001$ ; see also Fig. 2a), which is the driver of the ET model (Eqs. 2, 8 and 12), following the low humidity and augmented radiation load at this time of the year (Fig. 2 and Rotenberg and Yakir, 2011; Tatarinov et al., 2016). However, including the  $f_{WD}$  in the model helped to correct for this overestimation, by linking ET to the available soil water (Fig. 2a), resulting in a good agreement between the model and the eddy covariance estimates (Fig. 3c and 3e; Table 2).

Deleted: drought stress

Deleted: no-DS

Deleted: (Fig. 3a and 3e)

Deleted: no-DS

Deleted: r

Deleted: drought

Deleted: stress and the available water

Deleted: factors

When comparing the modeled GPP with the EC estimates at Yatir, the model without the  $f_{WD}$  (NO  $f_{WD}$  in Fig. 3b and 3f) produced higher values during both ends of the rainy season (October-November and May-June). In particular, the model without the  $f_{WD}$  overestimated the GPP during the start of the rainy season (indicated by the arrows in Fig. 3b). This was likely due to the increase in the NDVI following the appearance of ephemeral herbaceous plants in the understory of these Mediterranean forests in the beginning of the rainy season, as already pointed out in the previous section (see also Helman et al., 2015b). The herbaceous vegetation in the understory of Yatir provides a meaningful contribution to the NDVI signal,

Deleted: drought stress factor

Deleted: no

Deleted: -

Deleted: DS

Deleted: , Fig. 3b and 3f

Deleted: no-DS

Deleted: vegetation

Deleted: Also here, t

785 although it constitutes only a minor component in terms of the biomass and the CO<sub>2</sub> uptake  
 786 of the forest (Helman et al., 2015b; Rotenberg and Yakir, 2011). Considering  $f_{WD}$  in the  
 787 model thus abridged the RUE, counterbalancing the high contribution of the herbaceous  
 788 vegetation to the  $f_{APAR}$  through the high NDVI. This also better simulated the water deficit  
 789 conditions experienced by the woody vegetation, which is the main contributor to the GPP in  
 790 Yatir, during the dry period (Fig. 3d and 3f).

791 These results explicitly show that the water deficit factor is useful in “forcing” the model  
 792 onto the woody vegetation activities (strongly restricted by water shortage at both ends of the  
 793 rainy season), reducing the impact of other components, such as the peak activities of the  
 794 understory vegetation that, obviously, does not suffer from water shortage and responds to  
 795 small early season moisture input (Helman et al., 2014a, n.d.; Mussery et al., 2016).

796 Comparison with MODIS ET/GPP products show a consistent underestimation of the fluxes  
 797 at the peak season and overestimation at the dry season, implying that these models need to  
 798 be adjusted to root-zone water deficit conditions in such high-energy water-limited sites (Fig.  
 799 4). This is in spite of the use of vapor pressure data in these models (Mu et al., 2007, 2011,  
 800 Running et al., 2000, 2004). These results suggest that including the  $f_{WD}$  in global models,  
 801 such as the MODIS-based models, might at least reduce the observed dry period  
 802 overestimations and increase fluxes at the wet season.

## 803 5.2. Annual-basis comparisons

804 We then examined the adjusted RS-Met on an annual scale, first by comparing the inter-  
 805 annual variation in the modeled ET with that from the EC and with that from the MODIS ET  
 806 product at Yatir (Fig. 5a). This analysis indicated that RS-Met can also reproduce the annual  
 807 ET with a fair accuracy, showing a moderate but significant correlation with the total annual  
 808 ET derived from the daily summed EC estimates ( $R=0.78$ ;  $P<0.05$ ;  $N=10$ ; Fig. 5b) and  
 809 comparable mean annual ET ( $266\pm 61$  vs.  $257\pm 58$  mm  $y^{-1}$  for  $ET_{MOD}$  and  $ET_{EC}$ , respectively).  
 810 MODIS ET, in turn, was not correlated with EC ( $R=0.10$ ;  $P>0.1$ ;  $N=11$ ) showing little year-  
 811 to-year variations in the annual ET (Fig. 5a,c).

812 Both the RS-Met and the EC were significantly correlated with P ( $R=0.60$  and  $0.93$ ;  $P=0.05$   
 813 and  $<0.001$ , respectively), showing similar patterns in water use (ET/P ratio), though  
 814 differing in magnitude in some of the years studied (black and red lines in upper panel of Fig.  
 815 5a and Fig. S3). The little year-to-year variation in the MODIS ET resulted in a noisier  
 816 pattern of water use (green line in upper panel of Fig. 5a) compared to that calculated from

Deleted: the drought stress factor

Deleted: RS-Met

Deleted: P

Deleted: drought stress

Deleted: drought stress

Deleted: focusing

Deleted: RS

Deleted: data

Deleted: model with the drought-stress factor (DS model)

Deleted: , as well as with the annual rainfall (P)

Deleted: this

Deleted: site

Deleted: 4a

Deleted: the

Deleted: model

Deleted: r

Deleted: 4b

Deleted: r

Deleted: Fig. 4a

the RS-Met and EC. A noisy water use pattern was also noted in the RS-Met (compared to that from the EC), particularly in dry years (Fig. S3; e.g., 2003, 2005 and 2008; Fig. 5a). Higher ET in the RS-Met was likely the result of discrepancies in daily estimates during the summer between the RS-Met and EC ( $R=0.05$ ;  $P>0.1$  for June-August; Fig. 5d). This is supported by the observation of a 5-fold higher bias between EC and RS-Met summer daily estimates in those dry years (bias =  $-0.146 \text{ mm d}^{-1}$ ), compared to remaining years (bias =  $-0.029 \text{ mm d}^{-1}$ ). These negative biases imply an average overestimation by the RS-Met model during the summer compared to observed (EC) ET estimates.

In contrast, the correlation between the RS-Met and EC was high and significant for daily estimates during the rainy season ( $R=0.80$ ;  $P<0.0001$  for October-May; Fig. 5e). The relatively large discrepancies between RS-Met and EC during the summer indicate the low sensitivity of the RS-Met model to relatively low ET fluxes (i.e.,  $<1.0 \text{ mm d}^{-1}$ ). This likely suggests the need to adjust the water availability factor ( $f_{WA}$ ) to positive values for a longer period, particularly at the end of the rainy season-beginning of the summer.

The annual ET, as estimated from both the RS-Met and EC, was higher than the total rainfall amount in some of the years studied (Fig. S3). A similar pattern was previously reported in forests in water-limited regions (Helman et al., 2016; Raz-Yaseef et al., 2012; Williams et al., 2012). ET higher than rainwater supply indicates that trees use water stored in deep soil layers during wet years in the subsequent dry years (e.g., 2006 and 2008; Raz-Yaseef et al., 2012; Barbeta et al., 2015). Thus, the ‘transfer’ of surplus rainwater from previous years should be also taken into consideration when adjusting the model with available water through the  $f_{WA}$  and  $f_{WD}$ , which are currently calculated only with the seasonal rainfall. Theoretically, this could be done by summing the available water from the previous year (calculated as  $P - ET$ ) to the two-month summed P in the calculation of the  $f_{WA}$  and  $f_{WD}$ . Of course, this would be applied only after completing the ET estimation of the first year.

The adjusted RS-Met GPP (i.e., that with the  $f_{WD}$ ) was also comparable to the GPP from the EC ( $765 \pm 112$  vs.  $748 \pm 124 \text{ g C m}^{-2} \text{ y}^{-1}$ , for  $GPP_{MOD}$  and  $GPP_{EC}$ , respectively), and highly correlated at the annual scale (Fig. 6a,b), with an  $R = 0.91$  ( $P<0.001$ ;  $N=9$ ) and a low MAE of  $52 \text{ g C m}^{-2} \text{ y}^{-1}$  (Relative error of c. 7%). MODIS GPP showed inferior correlation with EC estimates at the annual scale, with an  $R$  of  $0.58$  ( $P=0.08$ ;  $N=10$ , Fig. 6c).

## 6. Testing the RS-Met across a rainfall gradient

Deleted: In general, the interannual trend in ET/P was much  
Deleted: noisier  
Deleted: when using ET from  
Deleted: . This  
Deleted: was particularly noted in  
Deleted: when the ET from the RS-Met was significantly different from the EC annual estimates (  
Deleted: 2004  
Deleted: 2006  
Deleted: 2010  
Deleted: 4a  
Deleted: These  
Deleted: differences in annual ET most  
Deleted: ed  
Deleted: from  
Deleted: between the two methods  
Deleted: r  
Deleted:  
Deleted: 4c  
Deleted: c  
Deleted: 2004, 2006 and 2010  
Deleted: , which were particularly dry years  
Deleted: that from  
Deleted: Additionally, t  
Deleted: EC  
Deleted: r  
Deleted:  
Deleted: 4d  
Deleted: limitation  
Deleted: in estimating  
Deleted: values  
Deleted: in some sites  
Deleted: 4a

Deleted: modeled  
Deleted: i.e., WS  
Deleted: model  
Deleted: 5  
Deleted: r

Deleted: models

907 6.1. Comparison with *seasonal ET and GPP from EC and MODIS products* Deleted: daily

908 We next compared the ET and GPP estimates from the RS-Met model with the field

909 campaign data *and MODIS ET/GPP products* across the remaining six ecosystems.

910 Comparison between estimates based on the RS-Met model, with and without the  $f_{WD}$ , with Deleted: (DS)

911 those from the EC, indicated significantly higher correlations of the *adjusted model (i.e., with* Deleted: (no-DS)

912 *the  $f_{WD}$ )*, with EC estimates ( $P=0.06$  and  $P<0.01$  for ET and GPP, respectively; Table 2). Only Deleted: drought stress factor

913 the shrubland site of Kadita showed a higher *ET* correlation of *EC with the unadjusted* Deleted: DS

914 *model*. This was *likely* due to the continuous ET fluxes throughout the summer period in this Deleted: s

915 relatively moist site, which was not captured by the model. Deleted: no-DS

916 In general, while using the  $f_{WD}$  did not improve (for the ET,  $P>0.1$ , as indicated by a two- Deleted: with the eddy covariance measurements of the ET

917 tailed Student's  $t$ -test) or only marginally improved (for the GPP,  $P=0.09$ , as indicated by a Deleted: This likely indicates the sensitivity of the current

918 two-tailed Student's  $t$ -test) RS-Met estimates in the non-forest sites, it significantly improved drought stress factor to local conditions.

919 the ET and GPP estimates in forest sites ( $P=0.05$  and  $P=0.016$  for ET and GPP, respectively, Deleted: drought stress factor

920 as indicated by a two-tailed Student's  $t$ -test). *The adjusted* RS-Met successfully tracked Deleted: estimates that included drought stress factor

921 *changes in* ET and CO<sub>2</sub> fluxes *from dry to wet season* in all sites. *Similar to the shown in* Deleted: the seasonality

922 *Yatir, MODIS ET/GPP fluxes were much lower than observed fluxes. This underestimation* Deleted: of the measured

923 *was particularly noted in the forest sites (Fig. 7 and Fig. S4).* Deleted: in

924 Overall, the *adjusted* RS-Met was in good agreement with the eddy covariance Deleted: , though it should be mentioned that the sites of

925 measurements, with the cross-site regressions producing highly significant linear fits (Fig. *8a,* Kadita and Wady Attir had limited measurements to test this

926 *b;  $R=0.82$  and  $R=0.86$ ; and MAE = 0.47 mm d<sup>-1</sup> and MAE = 1.89 g C m<sup>-2</sup> d<sup>-1</sup> for ET and* Deleted: (Fig. 6).

927 *GPP, respectively).* *Comparing between the EC vs. RS-Met regressions and the EC vs.* Deleted: 7a

928 *MODIS ET/GPP regressions, using 8-day averaged fluxes values, produced the following* Deleted: r

929 *linear fits:  $ET_{RS-Met} = 1.16 ET_{EC} - 0.11$  ( $R = 0.88$ ;  $P<0.0001$ ;  $N = 36$ ) and  $ET_{MODIS} = 0.38$  Deleted: r*

930  $ET_{EC} + 0.33$  ( $R = 0.65$ ;  $P<0.0001$ ;  $N = 33$ ) and  $GPP_{RS-Met} = 1.09 GPP_{EC} + 0.21$  ( $R = 0.92$ ; Deleted: r

931  $P<0.0001$ ;  $N = 36$ ) and  $GPP_{MODIS} = 0.43 GPP_{EC} + 1.31$  ( $R = 0.77$ ;  $P<0.0001$ ;  $N = 33$ ), Deleted: r

932 *showing a consistent underestimation of both MODIS products (MOD16 and MOD17) in*

933 *those sites across sites (Fig. 8c,d).*

934 The water-use efficiency (WUE; the slope of the regression between ET and GPP in Fig. *S5*) Deleted: 7c

935 was slightly higher at 2.32 g C kg<sup>-1</sup> H<sub>2</sub>O from the RS-Met compared to the low 1.76 g C kg<sup>-1</sup>

936 H<sub>2</sub>O from EC, but it was within the range reported for similar ecosystems in this region

937 (Tang et al., 2014).

938 6.2. Annual-basis comparisons Deleted: with ET from PaVI-E

962 To expand our analysis across the rainfall gradient, and because we do not have continuous  
 963 estimations from the EC at the six sites, we compared the annual ET and GPP from the  
 964 adjusted RS-Met with those from MODIS ET/GPP products. In the case of ET, we also added  
 965 annual estimates derived from the empirical PaVI-E model (Helman et al. 2015).

Deleted: that

Deleted: retrieved

Deleted: -

Deleted: in these sites

966 The results of our ET comparison showed that the RS-Met and PaVI-E models produced  
 967 comparable estimates in most of the sites (Fig. 9a), with the only exception being the dryland  
 968 non-forest site of Wady Attir, which showed higher estimates from RS-Met than from PaVI-

Deleted: 8

969 E ( $P < 0.01$ , as indicated by Tukey HSD separation procedure). MODIS ET was in accordance

Deleted: a Student's *t*-test

970 with estimates of RS-Met and PaVI-E in shrubland sites in spite of the underestimation of  
 971 this product during the wet season likely due to the relatively higher ET at the beginning of  
 972 the rainy season (Fig. 7a). However, MODIS ET was significantly lower than the other two

973 models in the forest sites and also lower than the shrubland sites (Fig. 9a). The cross-site  
 974 regression between the annual estimates from RS-Met vs. those from the EC produced a  
 975 highly significant linear fit ( $R = 0.94$ ;  $P < 0.01$ ), confirming the potential use of the RS-Met in  
 976 assessing ET at the annual scale across the rainfall gradient in those forest and non-forest  
 977 sites.

Deleted: In the forest sites, annual ET retrieved from RS-Met was generally higher than that derived from PaVI-E, especially in the wetter site of HaSolelim. Nevertheless, t

Deleted: r

978 MODIS GPP showed relatively comparable estimates to RS-Met at the annual scale due to its  
 979 overestimation during the dry season that compensated its underestimation during the peak  
 980 growth season (Fig. 9b). Here again, though, underestimation was observed in forest sites,  
 981 particularly in the sites of Eshtaol and Birya.

### 982 6.3. Changes in water use efficiency following afforestation across rainfall gradient

983 We finally used the adjusted RS-Met to assess the impact of afforestation on the water and  
 984 carbon budgets across the rainfall gradient in Israel by comparing fluxes in the three pine  
 985 forests (i.e., Yatir, Eshtaol and Birya) with those from the adjacent shrubland sites (i.e., Wady  
 986 Attir, Modiin and Kadita, respectively). Results showed that the ET significantly increased  
 987 due to the afforestation of these areas, particularly at the more humid site of Birya (c. 53%),  
 988 but to a lesser extent at the less humid site of Eshtaol (by c. 20%) and with almost no change  
 989 in ET in the dryland site of Yatir (4%). The GPP also significantly increased in those three  
 990 paired-sites. Overall, afforestation across the rainfall gradient was responsible for a  
 991 significant increase in the WUE in this region (Fig. 10). Nevertheless, the positive change in  
 992 the WUE decreased when moving from the dry Yatir-Wady Attir paired site ( $279 \text{ mm y}^{-1}$ ) to

Deleted: models

Deleted: 9

1005 the more humid paired-site of Biry-Kadita (766 mm y<sup>-1</sup>; Fig. 10), strengthening the  
1006 importance of afforestation efforts in drylands areas.

1007

1008 **7. Summary and conclusions**

1009 We have tested here a biophysical-based model of ET and CO<sub>2</sub> fluxes driven by satellite-  
1010 derived vegetation index and meteorological data (RS-Met) and adjusted with a seasonal  
1011 water deficit factor. The model was validated against direct flux measurements from  
1012 extensive field campaigns and a fixed Fluxnet station, and compared with MODIS ET/GPP  
1013 products at seven evergreen forest and adjacent non-forested ecosystem sites along a steep  
1014 rainfall gradient in the high-energy water-limited Eastern Mediterranean region. Adjusting  
1015 the model with the water deficit factor generally improved its performance compared to using  
1016 the model without this factor, particularly in forest sites. The model also outperformed  
1017 MODIS-based ET/GPP models, which showed generally lower estimates, particularly in the  
1018 forest sites suggesting that these models might benefit from the inclusion of the water deficit  
1019 factor.

1020 Our results show the potential use of this simple biophysical remote-sensing-based model in  
1021 assessing ET and GPP on a daily basis and at a moderate spatial resolution of 250 m, even in  
1022 high-energy water-limited environments. The addition of a water deficit factor (based on  
1023 daily rainfall and radiation and/or temperature data alone) in the RS-Met significantly  
1024 improved its performance in shrublands and especially in forests in this region and might be  
1025 used in other global models. Nevertheless, careful attention should be paid to adjusting the  
1026 deficit water factor to local conditions, with their further development particularly required at  
1027 the end of the rainy season-beginning of the dry period.

1028 Using the RS-Met, we were able to estimate changes in water use efficiency due to  
1029 afforestation across the rainfall gradient in Israel. Overall, afforestation across our study area  
1030 was responsible for a significant increase in the WUE. However, the positive change in the  
1031 WUE decreased when moving from dry (279 mm y<sup>-1</sup>) to more humid (766 mm y<sup>-1</sup>) regions,  
1032 strengthening the importance of drylands afforestation.

1033 Finally, the use of this simple RS-Met approach linked to flexible campaign-based ground  
1034 validation, as demonstrated in this study, represents a powerful basis for the reliable  
1035 extension of ET and GPP estimates across spatial and temporal scales in regions with low  
1036 density of flux stations.

Deleted: 9

Deleted: using

Deleted: and without the inclusion of

Deleted: and water availability

Deleted: s for daily estimations of ET and CO<sub>2</sub> fluxes,

Deleted: validating

Deleted: the model

Deleted: Adding

Deleted: in the RS-Met

Deleted: the

Deleted: use of the

Deleted: s

Deleted: to

Deleted: (based on daily rainfall and radiation and/or temperature data alone)

Deleted: the

Deleted: estimation

Deleted: of these fluxes

Deleted: available and

Deleted: s

Deleted: the

1058

1059 **Acknowledgments**

1060 David Helman acknowledges personal grants provided by the Bar-Ilan University  
1061 Presidential Office (Milgat Hanasi), the JNF-Rieger Foundation, USA, and the Hydrological  
1062 Service of Israel, Water Authority. S. Rohatyn acknowledges scholarships provided by  
1063 Ronnie Appleby fund, the Advanced School of Environmental Science of the Hebrew  
1064 University, and the Israel Ministry of Agriculture. We thank E. Ramati for helping with field  
1065 work and data processing, G. Fratini for helping with EddyPro, and H. Sagi and A. Pelter for  
1066 technical assistance. We are also grateful to the Meteorological Service of Israel for  
1067 providing meteorological data and to NASA for making public the MODIS NDVI datasets.  
1068 This research was partly supported by the Hydrological Service of Israel, Water Authority  
1069 (Grant No. 4500962964). Flux measurements were made possible through the financial  
1070 support from the Israel Science Foundation (ISF), Minerva foundation, JNF-KKL, the  
1071 Hydrological Service of Israel, Water Authority, and C. Wills and R. Lewis program in  
1072 Environmental Science.

1073

1074 **References**

- 1075 Afik, T., 2009. Quantitative estimation of CO<sub>2</sub> fluxes in a semi-arid forest and their  
1076 dependence on climatic factors. Thesis submitted to R.H. Smith Faculty of Agriculture,  
1077 Food and Environment of Hebrew University, Rehovot, Israel (in Hebrew). Thesis  
1078 submitted to R.H. Smith Faculty of Agriculture, Food and Environment of Hebrew  
1079 University, Rehovot, Israel (in Hebrew).
- 1080 Ahlström, A., Raupach, M.R., Schurgers, G., Smith, B., Arneth, A., Jung, M., Reichstein, M.,  
1081 Canadell, J.G., Friedlingstein, P., Jain, A.K., Kato, E., Poulter, B., Sitch, S., Stocker,  
1082 B.D., Viovy, N., Wang, Y.P., Wiltshire, A., Zaehle, S., Zeng, N., 2015. The dominant  
1083 role of semi-arid ecosystems in the trend and variability of the land CO<sub>2</sub> sink. *Science*  
1084 (80-. ). 348, 895–899. doi:10.1126/science.aaa1668
- 1085 Allen, R.G., Pereira, L.S., Raes, D., 1998. Crop evapotranspiration : guidelines for computing  
1086 crop water requirements, FAO irrigation and drainage papers;56. FAO, Rome.
- 1087 Allen, R. G., Pruitt, W. O., Wright, J. L., Howell, T. A., Ventura, F., Snyder, R., Itenfisu, D.,  
1088 Steduto, P., Berengena, J., Yrisarry, J. B., Smith, M., Pereira, L. S., Raes, D., Perrier, A.,  
1089 Alves, I., Walter, I. and Elliott, R.: A recommendation on standardized surface resistance

1090 for hourly calculation of reference ETo by the FAO56 Penman-Monteith method, *Agric.*  
1091 *Water Manag.*, 81(1), 1–22, doi:<http://dx.doi.org/10.1016/j.agwat.2005.03.007>, 2006.

1092 Asaf, D., Rotenberg, E., Tatarinov, F., Dicken, U., Montzka, S.A., Yakir, D., 2013.  
1093 Ecosystem photosynthesis inferred from measurements of carbonyl sulphide flux. *Nat.*  
1094 *Geosci* 6, 186–190.

1095 Aubinet, M., Grelle, A., Ibrom, A., Rannik, S., Moncrieff, J., Foken, T., Kowalski, A.S.,  
1096 Martin, P.H., Berbigier, P., Bernhofer, C., Clement, R., Elbers, J.A., Granier, A.,  
1097 Grünwald, T., Morgenstern, K., Pilegaard, K., Rebmann, C., Snijders, W., Valentini, R.,  
1098 Vesa, T., 2000. Estimates of the annual net carbon and water exchange of forests: the  
1099 EUROFLUX methodology. *Adv. Ecol. Res.* 30, 113–175.

1100 Baldocchi, D.D., 2003. Assessing the eddy covariance technique for evaluating carbon  
1101 dioxide exchange rates of ecosystems: past, present and future. *Glob. Chang. Biol.* 9,  
1102 479–492.

1103 Barbeta, A., Mejía-Chang, M., Ogaya, R., Voltas, J., Dawson, T.E., Peñuelas, J., 2015. The  
1104 combined effects of a long-term experimental drought and an extreme drought on the  
1105 use of plant-water sources in a Mediterranean forest. *Glob. Chang. Biol.* 21, 1213–1225.  
1106 doi:10.1111/gcb.12785

1107 Ciais, P., Reichstein, M., Viovy, N., Granier, a, Ogée, J., Allard, V., Aubinet, M.,  
1108 Buchmann, N., Bernhofer, C., Carrara, a, Chevallier, F., De Noblet, N., Friend, a D.,  
1109 Friedlingstein, P., Grünwald, T., Heinesch, B., Keronen, P., Knohl, a, Krinner, G.,  
1110 Loustau, D., Manca, G., Matteucci, G., Miglietta, F., Ourcival, J.M., Papale, D.,  
1111 Pilegaard, K., Rambal, S., Seufert, G., Soussana, J.F., Sanz, M.J., Schulze, E.D., Vesala,  
1112 T., Valentini, R., 2005. Europe-wide reduction in primary productivity caused by the  
1113 heat and drought in 2003. *Nature* 437, 529–533. doi:10.1038/nature03972

1114 Cleveland, W.S., 1979. Robust locally weighted regression and smoothing scatterplots. *J.*  
1115 *Am. Stat. Assoc.* 74, 829–836.

1116 Gamon, J.A., Field, C.B., Goulden, M.L., Griffin, K.L., Hartley, A.E., Joel, G., Peñuelas, J.,  
1117 Valentini, R., 1995. Relationships between NDVI, canopy structure, and photosynthesis  
1118 in three Californian vegetation types. *Ecol. Appl.* 28–41.

1119 Garbulsky, M.F., Filella, I., Verger, a., Peñuelas, J., 2014. Photosynthetic light use efficiency



1120 from satellite sensors: From global to Mediterranean vegetation. *Environ. Exp. Bot.* 103,  
1121 3–11. doi:10.1016/j.envexpbot.2013.10.009

1122 Garbulsky, M.F., Penuelas, J., Papale, D., Filella, I., 2008. Remote estimation of carbon  
1123 dioxide uptake by a Mediterranean forest. *Glob. Chang. Biol.* 14, 2860–2867.  
1124 doi:10.1111/j.1365-2486.2008.01684.x

1125 Glenn, E., Nagler, P., Huete, A., 2010. Vegetation Index Methods for Estimating  
1126 Evapotranspiration by Remote Sensing. *Surv. Geophys.* 31, 531–555.  
1127 doi:10.1007/s10712-010-9102-2

1128 Glenn, E.P., Huete, A.R., Nagler, P.L., Nelson, S.G., 2008. Relationship Between Remotely-  
1129 sensed Vegetation Indices, Canopy Attributes and Plant Physiological Processes: What  
1130 Vegetation Indices Can and Cannot Tell Us About the Landscape. *Sensors* 8, 2136–  
1131 2160. doi:10.3390/s8042136

1132 Glenn, E.P., Neale, C.M.U., Hunsaker, D.J., Nagler, P.L., 2011. Vegetation index-based crop  
1133 coefficients to estimate evapotranspiration by remote sensing in agricultural and natural  
1134 ecosystems. *Hydrol. Process.* 25, 4050–4062. doi:10.1002/hyp.8392

1135 Helman, D., (under review). Land Surface Phenology: What do we really 'see' from space?

1136 Helman, D., Givati, A., Lensky, I.M., 2015a. Annual evapotranspiration retrieved from  
1137 satellite vegetation indices for the eastern Mediterranean at 250 m spatial resolution.  
1138 *Atmos. Chem. Phys.* 15, 12567–12579. doi:10.5194/acp-15-12567-2015

1139 Helman, D., Lensky, I.M., Mussery, A., Leu, S., 2014a. Rehabilitating degraded drylands by  
1140 creating woodland islets: Assessing long-term effects on aboveground productivity and  
1141 soil fertility. *Agric. For. Meteorol.* doi:10.1016/j.agrformet.2014.05.003

1142 Helman, D., Lensky, I.M., Tessler, N., Osem, Y., 2015b. A phenology-based method for  
1143 monitoring woody and herbaceous vegetation in Mediterranean forests from NDVI time  
1144 series. *Remote Sens.* 7, 12314–12335. doi:10.3390/rs70912314

1145 Helman, D., Lensky, I.M., Yakir, D., Osem, Y., 2016. Forests growing under dry conditions  
1146 have higher hydrological resilience to drought than do more humid forests. *Glob. Chang.*  
1147 *Biol.* doi:10.1111/gcb.13551

1148 Helman, D., Leu, S., Mussery, A., (under review) Contrasting effects of two *Acacia* species  
1149 on understorey growth in a drylands environment: Interplay of water and light

1150 availability.

1151 Helman, D., Mussery, A., Lensky, I.M., Leu, S., 2014b. Detecting changes in biomass  
 1152 productivity in a different land management regimes in drylands using satellite-derived  
 1153 vegetation index. *Soil Use Manag.* 30, 32–39. doi:10.1111/sum.12099

1154 Helman, D., Osem, Y., Yakir, D., Lensky, I.M., 2017. Relationships between climate,  
 1155 topography, water use and productivity in two key Mediterranean forest types with  
 1156 different water-use strategies. *Agric. For. Meteorol.* 232, 319–330.  
 1157 doi:http://dx.doi.org/10.1016/j.agrformet.2016.08.018

1158 Huete, A., Didan, K., Miura, T., Rodriguez, E.P., Gao, X., Ferreira, L.G., 2002. Overview of  
 1159 the radiometric and biophysical performance of the MODIS vegetation indices. *Remote*  
 1160 *Sens. Environ.* 83, 195–213.

1161 Jensen, M.E., Haise, H.R., 1963. Estimating evapotranspiration from solar radiation. *Proc.*  
 1162 *Am. Soc. Civ. Eng. J. Irrig. Drain. Div.* 89, 15–41.

1163 Jung, M., Reichstein, M., Ciais, P., Seneviratne, S.I., Sheffield, J., Goulden, M.L., Bonan, G.,  
 1164 Cescatti, A., Chen, J., de Jeu, R., Dolman, A.J., Eugster, W., Gerten, D., Gianelle, D.,  
 1165 Gobron, N., Heinke, J., Kimball, J., Law, B.E., Montagnani, L., Mu, Q., Mueller, B.,  
 1166 Oleson, K., Papale, D., Richardson, A.D., Rouspard, O., Running, S., Tomelleri, E.,  
 1167 Viovy, N., Weber, U., Williams, C., Wood, E., Zaehle, S., Zhang, K., 2010. Recent  
 1168 decline in the global land evapotranspiration trend due to limited moisture supply.  
 1169 *Nature* 467, 951–954. doi:10.1038/nature09396

1170 Kalma, J., McVicar, T., McCabe, M., 2008. Estimating Land Surface Evaporation: A Review  
 1171 of Methods Using Remotely Sensed Surface Temperature Data. *Surv. Geophys.* 29,  
 1172 421–469. doi:10.1007/s10712-008-9037-z

1173 Klein, T., Rotenberg, E., Tatarinov, F., Yakir, D., 2016. Association between sap flow-  
 1174 derived and eddy covariance-derived measurements of forest canopy CO<sub>2</sub> uptake. *New*  
 1175 *Phytol.* 209, 436–446. doi:10.1111/nph.13597

1176 Klein, T., Shpringer, I., Fikler, B., Elbaz, G., Cohen, S., Yakir, D., 2013. Relationships  
 1177 between stomatal regulation, water-use, and water-use efficiency of two coexisting key  
 1178 Mediterranean tree species. *For. Ecol. Manage.* 302, 34–42.

1179 Kool, D., Agam, N., Lazarovitch, N., Heitman, J.L., Sauer, T.J., Ben-Gal, a., 2014. A review

1180 of approaches for evapotranspiration partitioning. *Agric. For. Meteorol.* 184, 56–70.  
1181 doi:10.1016/j.agrformet.2013.09.003

1182 Llusia, J., Rohtyn, S., Yakir, D., Rotenberg, E., Seco, R., Guenther, A., Peñuelas, J., 2016.  
1183 Photosynthesis, stomatal conductance and terpene emission response to water  
1184 availability in dry and mesic Mediterranean forests. *Trees* 30, 749–759.  
1185 doi:10.1007/s00468-015-1317-x

1186 Ma, X., Huete, A., Yu, Q., Restrepo-Coupe, N., Beringer, J., Hutley, L.B., Kanniah, K.D.,  
1187 Cleverly, J., Eamus, D., 2014. Parameterization of an ecosystem light-use-efficiency  
1188 model for predicting savanna GPP using MODIS EVI. *Remote Sens. Environ.* 154, 253–  
1189 271. doi:10.1016/j.rse.2014.08.025

1190 Maselli, F., Barbati, A., Chiesi, M., Chirici, G., Corona, P., 2006. Use of remotely sensed and  
1191 ancillary data for estimating forest gross primary productivity in Italy. *Remote Sens.*  
1192 *Environ.* 100, 563–575. doi:10.1016/j.rse.2005.11.010

1193 Maselli, F., Papale, D., Chiesi, M., Matteucci, G., Angeli, L., Raschi, A., Seufert, G., 2014.  
1194 Operational monitoring of daily evapotranspiration by the combination of MODIS  
1195 NDVI and ground meteorological data: Application and evaluation in Central Italy.  
1196 *Remote Sens. Environ.* 152, 279–290. doi:10.1016/j.rse.2014.06.021

1197 Maselli, F., Papale, D., Puletti, N., Chirici, G., Corona, P., 2009. Combining remote sensing  
1198 and ancillary data to monitor the gross productivity of water-limited forest ecosystems.  
1199 *Remote Sens. Environ.* 113, 657–667. doi:10.1016/j.rse.2008.11.008

1200 Maseyk, K., Hemming, D., Angert, A., Leavitt, S.W., Yakir, D., 2011. Increase in water-use  
1201 efficiency and underlying processes in pine forests across a precipitation gradient in the  
1202 dry Mediterranean region over the past 30 years. *Oecologia* 167, 573–585.  
1203 doi:10.1007/s00442-011-2010-4

1204 Maseyk, K.S., Lin, T., Rotenberg, E., Grünzweig, J.M., Schwartz, A., Yakir, D., 2008.  
1205 Physiology-phenology interactions in a productive semi-arid pine forest. *New Phytol.*  
1206 178, 603–616.

1207 Monteith, J.L., 1977. Climate and the efficiency of crop production in Britain. *Phil. Trans. R.*  
1208 *Soc. Lond. B* 281, 277–294.

1209 Mu, Q., Heinsch, F. A., Zhao, M. and Running, S. W.: Development of a global

1210 evapotranspiration algorithm based on MODIS and global meteorology data, *Remote*  
1211 *Sens. Environ.*, 111, 519–536, doi:10.1016/j.rse.2006.07.007, 2007.

1212 Mu, Q., Zhao, M. and Running, S. W.: Improvements to a MODIS global terrestrial  
1213 evapotranspiration algorithm, *Remote Sens. Environ.*, 115(8), 1781–1800,  
1214 doi:10.1016/j.rse.2011.02.019, 2011.

1215 Mussery, A., Helman, D., Leu, S., Budovsky, A., 2016. Modeling herbaceous productivity  
1216 considering tree-grass interactions in drylands savannah: The case study of Yatir farm in  
1217 the Negev drylands. *J. Arid Environ.* 124, 160–164. doi:10.1016/j.jaridenv.2015.08.013

1218 Myneni, R.B., Williams, D.L., 1994. On the relationship between FAPAR and NDVI.  
1219 *Remote Sens. Environ.* 49, 200–211. doi:10.1016/0034-4257(94)90016-7

1220 Nagaraja Rao, C.R., 1984. Photosynthetically active components of global solar radiation:  
1221 Measurements and model computations. *Arch. Meteorol. Geophys. Bioclimatol. Ser. B*  
1222 34, 353–364. doi:10.1007/BF02269448

1223 Osem, Y., Zangy, E., Bney-Moshe, E., Moshe, Y., 2012. Understory woody vegetation in  
1224 manmade Mediterranean pine forests: variation in community structure along a rainfall  
1225 gradient. *Eur. J. For. Res.* 131, 693–704. doi:10.1007/s10342-011-0542-0

1226 Peñuelas, J., Garbulsky, M.F., Filella, I., 2011. Photochemical reflectance index (PRI) and  
1227 remote sensing of plant CO<sub>2</sub> uptake. *New Phytol.* 191, 596–9. doi:10.1111/j.1469-  
1228 8137.2011.03791.x

1229 Raz-Yaseef, N., Yakir, D., Schiller, G., Cohen, S., 2012. Dynamics of evapotranspiration  
1230 partitioning in a semi-arid forest as affected by temporal rainfall patterns. *Agric. For.*  
1231 *Meteorol.* 157, 77–85. doi:10.1016/j.agrformet.2012.01.015

1232 Reichstein, M., Bahn, M., Ciais, P., Frank, D., Mahecha, M.D., Seneviratne, S.I.,  
1233 Zscheischler, J., Beer, C., Buchmann, N., Frank, D.C., Papale, D., Rammig, A., Smith,  
1234 P., Thonicke, K., Velde, M. van der, Vicca, S., Walz, A., Wattenbach, M., 2013.  
1235 Climate extremes and the carbon cycle. *Nature* 500, 287–295. doi:10.1038/nature12350

1236 Reichstein, M., Falge, E., Baldocchi, D., Papale, D., Aubinet, M., Berbigier, P., Bernhofer,  
1237 C., Buchmann, N., Gilmanov, T., Granier, A., Grünwald, T., Havránková, K.,  
1238 Ilvesniemi, H., Janous, D., Knohl, A., Laurila, T., Lohila, A., Loustau, D., Matteucci,  
1239 G., Meyers, T., Miglietta, F., Ourcival, J.-M., Pumpanen, J., Rambal, S., Rotenberg, E.,

1240 Sanz, M., Tenhunen, J., Seufert, G., Vaccari, F., Vesala, T., Yakir, D., Valentini, R.,  
1241 2005. On the separation of net ecosystem exchange into assimilation and ecosystem  
1242 respiration: review and improved algorithm. *Glob. Chang. Biol.* 11, 1424–1439.  
1243 doi:10.1111/j.1365-2486.2005.001002.x

1244 Rotenberg, E., Yakir, D., 2011. Distinct patterns of changes in surface energy budget  
1245 associated with forestation in the semiarid region. *Glob. Chang. Biol.* 17, 1536–1548.  
1246 doi:10.1111/j.1365-2486.2010.02320.x

1247 Running, S.W., Nemani, R.R., 1988. Relating seasonal patterns of the AVHRR vegetation  
1248 index to simulated photosynthesis and transpiration of forests in different climates.  
1249 *Remote Sens. Environ.* 24, 347–367. doi:10.1016/0034-4257(88)90034-X

1250 Running, S.W., Nemani, R.R., Heinsch, F.A., Zhao, M., Reeves, M., Hashimoto, H., 2004. A  
1251 Continuous Satellite-Derived Measure of Global Terrestrial Primary Production.  
1252 *Bioscience* 54, 547–560. doi:10.1641/0006-3568(2004)054[0547:ACSMOG]2.0.CO;2

1253 Running, S.W., Thornton, P.E., Nemani, R., Glassy, J.M., 2000. Global Terrestrial Gross and  
1254 Net Primary Productivity from the Earth Observing System, in: *Methods in Ecosystem*  
1255 *Science*. Ed. O E Sala, R B Jackson, H A Mooney, and R W Howarth, pp. 44–57.

1256 Schimel, D., Pavlick, R., Fisher, J.B., Asner, G.P., Saatchi, S., Townsend, P., Miller, C.,  
1257 Frankenberg, C., Hibbard, K., Cox, P., 2015. Observing terrestrial ecosystems and the  
1258 carbon cycle from space. *Glob. Chang. Biol.* 21, 1762–1776. doi:10.1111/gcb.12822

1259 Sims, D.A., Rahman, A.F., Cordova, V.D., El-Masri, B.Z., Baldocchi, D.D., Bolstad, P. V.,  
1260 Flanagan, L.B., Goldstein, A.H., Hollinger, D.Y., Misson, L., Monson, R.K., Oechel,  
1261 W.C., Schmid, H.P., Wofsy, S.C., Xu, L., 2008. A new model of gross primary  
1262 productivity for North American ecosystems based solely on the enhanced vegetation  
1263 index and land surface temperature from MODIS. *Remote Sens. Data Assim. Spec.*  
1264 *Issue* 112, 1633–1646. doi:10.1016/j.rse.2007.08.004

1265 Sprintsin, M., Cohen, S., Maseyk, K., Rotenberg, E., Grünzweig, J., Karnieli, a., Berliner, P.,  
1266 Yakir, D., 2011. Long term and seasonal courses of leaf area index in a semi-arid forest  
1267 plantation. *Agric. For. Meteorol.* 151, 565–574. doi:10.1016/j.agrformet.2011.01.001

1268 Tang, X., Li, H., Desai, A.R., Nagy, Z., Luo, J., Kolb, T.E., Olioso, A., Xu, X., Yao, L.,  
1269 Kutsch, W., Pilegaard, K., Köstner, B., Ammann, C., 2014. How is water-use efficiency

1270 of terrestrial ecosystems distributed and changing on Earth? *Sci. Rep.* 4, 7483.  
1271 doi:10.1038/srep07483

1272 Tatarinov, F., Rotenberg, E., Maseyk, K., Ogée, J., Klein, T., Yakir, D., 2016. Resilience to  
1273 seasonal heat wave episodes in a Mediterranean pine forest. *New Phytol.* 210, 485–496.  
1274 doi:10.1111/nph.13791

1275 Turner, D. P., Ritts, W. D., Cohen, W. B., Maeirsperger, T. K., Gower, S. T., Kirschbaum, A.  
1276 A., Running, S. W., Zhao, M., Wofsy, S. C., Dunn, A. L., Law, B. E., Campbell, J. L.,  
1277 Oechel, W. C., Kwon, H. J., Meyers, T. P., Small, E. E., Kurc, S. A. and Gamon, J. A.:  
1278 Site-level evaluation of satellite-based global terrestrial gross primary production and  
1279 net primary production monitoring, *Glob. Chang. Biol.*, 11(4), 666–684,  
1280 doi:10.1111/j.1365-2486.2005.00936.x, 2005.

1281 Veroustraete, F., Sabbe, H., Eerens, H., 2002. Estimation of carbon mass fluxes over Europe  
1282 using the C-Fix model and Euroflux data. *Remote Sens. Environ.* 83, 376–399.  
1283 <https://doi.org/10.1016/j.ecolmodel.2006.06.008>

1284 Wang, H., Zhao, P., Zou, L.L., McCarthy, H.R., Zeng, X.P., Ni, G.Y., Rao, X.Q., 2014. CO<sub>2</sub>  
1285 uptake of a mature *Acacia mangium* plantation estimated from sap flow measurements  
1286 and stable carbon isotope discrimination. *Biogeosciences* 11, 1393–1411.  
1287 doi:10.5194/bg-11-1393-2014

1288 Way, D. a., Oren, R., Kroner, Y., 2015. The space-time continuum: the effects of elevated  
1289 CO<sub>2</sub> and temperature on trees and the importance of scaling. *Plant. Cell Environ.* 38,  
1290 991–1007. doi:10.1111/pce.12527

1291 Williams, C.A., Reichstein, M., Buchmann, N., Baldocchi, D., Beer, C., Schwalm, C.,  
1292 Wohlfahrt, G., Hasler, N., Bernhofer, C., Foken, T., Papale, D., Schymanski, S.,  
1293 Schaefer, K., 2012. Climate and vegetation controls on the surface water balance:  
1294 Synthesis of evapotranspiration measured across a global network of flux towers. *Water*  
1295 *Resour. Res.* 48. doi:10.1029/2011WR011586

1296 Wu, C., Huang, W., Yang, Q., Xie, Q., 2015. Improved estimation of light use efficiency by  
1297 removal of canopy structural effect from the photochemical reflectance index (PRI).  
1298 *Agric. Ecosyst. Environ.* 199, 333–338. doi:10.1016/j.agee.2014.10.017

1299 Zhao, M., Running, S.W., 2010. Drought-Induced Reduction in Global Terrestrial Net

1300        Primary Production from 2000 Through 2009. *Science* (80-. ). 329, 940–943.

1301

1302 **Tables**

1303 Table 1. Site characteristics and locations divided into two groups of forest (top) and non-  
1304 forest (bottom) sites. In each group, sites are arranged from the dry to the humid (from top to  
1305 bottom).  
1306

| Site       | Location (Lat, N; Lon, E) | PFT | Dominant species          | Grazing | Altitude | P   | AF   |
|------------|---------------------------|-----|---------------------------|---------|----------|-----|------|
| Yatir      | 31.3451; 35.0519          | CF  | <i>P. halepensis</i>      | sheep   | 660      | 279 | 0.19 |
| Eshtaol    | 31.7953; 34.9954          | CF  | <i>P. halepensis</i>      | sheep   | 385      | 480 | 0.34 |
| HaSolelim  | 32.7464; 35.2317          | OF  | <i>Q. ithaburensis</i>    | cattle  | 180      | 543 | 0.42 |
| Birya      | 33.0015; 35.4823          | CF  | <i>P. halepensis</i>      | cattle  | 750      | 766 | 0.63 |
| Wady Attir | 31.3308; 34.9905          | SH  | <i>Phagnalon rupestre</i> | sheep   | 490      | 279 | 0.11 |
| Modiin     | 31.8698; 35.0125          | SH  | <i>S. spinosum</i>        | cattle  | 245      | 480 | 0.32 |
| Kadita     | 33.0110; 35.4614          | SH  | <i>S. spinosum</i>        | cattle  | 815      | 766 | 0.63 |

1307  
1308 PFT is the plant functional type (CF, Coniferous forest; OF, oak forest; SH, shrubland); Grazing indicates the main  
1309 grazing regime in the site; altitude is in meters above sea level; P is the mean annual rainfall (mm y<sup>-1</sup>); and AF is  
1310 the aridity factor calculated as the P to the ET<sub>0</sub> ratio (in mm mm<sup>-1</sup>).



1311 Table 2. Statistics of the comparison between the RS-Met with the addition of the water  
1312 deficit factor ( $f_{WD}$ ) and without its addition ( $NO\ f_{WD}$ ) and the eddy covariance-derived  
1313 measurements.  
1314

|            | ET (mm d <sup>-1</sup> ) |                    |             |              |          | GPP (g C m <sup>-1</sup> d <sup>-1</sup> ) |              |             |              |          |
|------------|--------------------------|--------------------|-------------|--------------|----------|--------------------------------------------|--------------|-------------|--------------|----------|
|            | N                        | Correlation        | MAE         |              |          | N                                          | Correlation  | MAE         |              |          |
|            |                          | $NO\ f_{WD}$       | $f_{WD}$    | $NO\ f_{WD}$ | $f_{WD}$ |                                            | $NO\ f_{WD}$ | $f_{WD}$    | $NO\ f_{WD}$ | $f_{WD}$ |
| Yatir      | 2228                     | 0.05 <sup>*</sup>  | <b>0.76</b> | 1.9          | 0.18     | 2293                                       | 0.56         | <b>0.77</b> | 1.3          | 0.8      |
| Eshtaol    | 47                       | 0.16 <sup>ns</sup> | <b>0.64</b> | 1.3          | 1.6      | 54                                         | 0.80         | <b>0.90</b> | 2.3          | 2.3      |
| HaSolelim  | 40                       | 0.72               | <b>0.79</b> | 2.0          | 0.8      | 41                                         | 0.80         | <b>0.88</b> | 2.1          | 2.1      |
| Birya      | 57                       | 0.72               | <b>0.85</b> | 1.8          | 1.8      | 57                                         | 0.64         | <b>0.72</b> | 4            | 3        |
| Wady Attir | 28                       | 0.80               | <b>0.91</b> | 0.5          | 0.7      | 29                                         | 0.90         | <b>0.92</b> | 0.7          | 1.0      |
| Modiin     | 43                       | 0.62               | <b>0.64</b> | 1.9          | 1.0      | 43                                         | 0.89         | <b>0.90</b> | 1.2          | 1.2      |
| Kadita     | 28                       | <b>0.80</b>        | 0.67        | 0.8          | 1.0      | 28                                         | 0.82         | <b>0.88</b> | 1.8          | 1.8      |

1315 The mean absolute error (MAE) is in mm d<sup>-1</sup> for the ET and in g C m<sup>-2</sup> d<sup>-1</sup> for the GPP. All the correlations were  
1316 highly statistically significant at  $P<0.001$ , except for the ET model without the  $f_{WD}$  at the forest site of Yatir (\*)  
1317 that was significant at  $P=0.02$ , and the site of Eshtaol that was not statistically significant (ns). The number of days  
1318 used for the correlation in each site and flux is indicated (N=days).  
1319

- Deleted: drought
- Deleted: stress
- Deleted: DS
- Deleted: no
- Deleted: DS
- Deleted: -DS
- Deleted: no
- Deleted: -DS
- Deleted: DS
- Deleted: DS
- Deleted: DS
- Deleted: no
- Deleted: -
- Deleted: DS
- Deleted: DS
- Deleted: DS
- Deleted: no-DS
- Deleted: DS
- Deleted: DS
- Deleted: DS
- Deleted: no-DS
- Deleted: DS
- Deleted: DS
- Deleted: DS
- Deleted: DS

## Figures

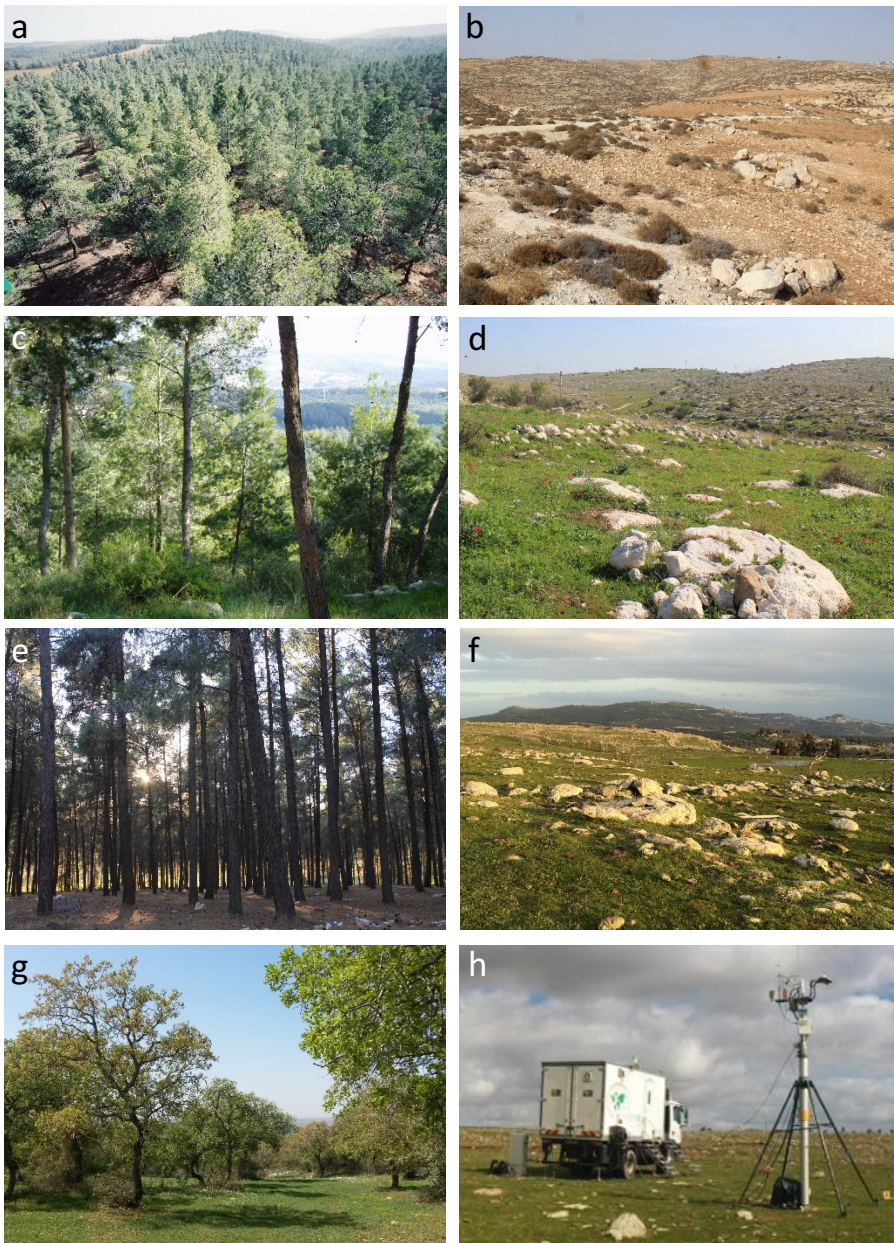

**Fig. 1.** Views of the seven study sites along the climatic gradient (**a – g**) and the newly mobile flux measurement system used in this study (**h**). Sites include three paired of planted pine forests (*Pinus halepensis*) and adjacent non-forest sites (representing the original environment on which these forests were planted): Yatir (**a**) and Wady Attir (**b**); Eshtaol (**c**) and Modiin (**d**); Biryia (**e**) and Kadita (**f**). The deciduous oak forest of HaSolelim is shown (**d**). The three paired sites (**a-f**) represent the geo-climatic transition from xeric to mesic environments in Israel, respectively.

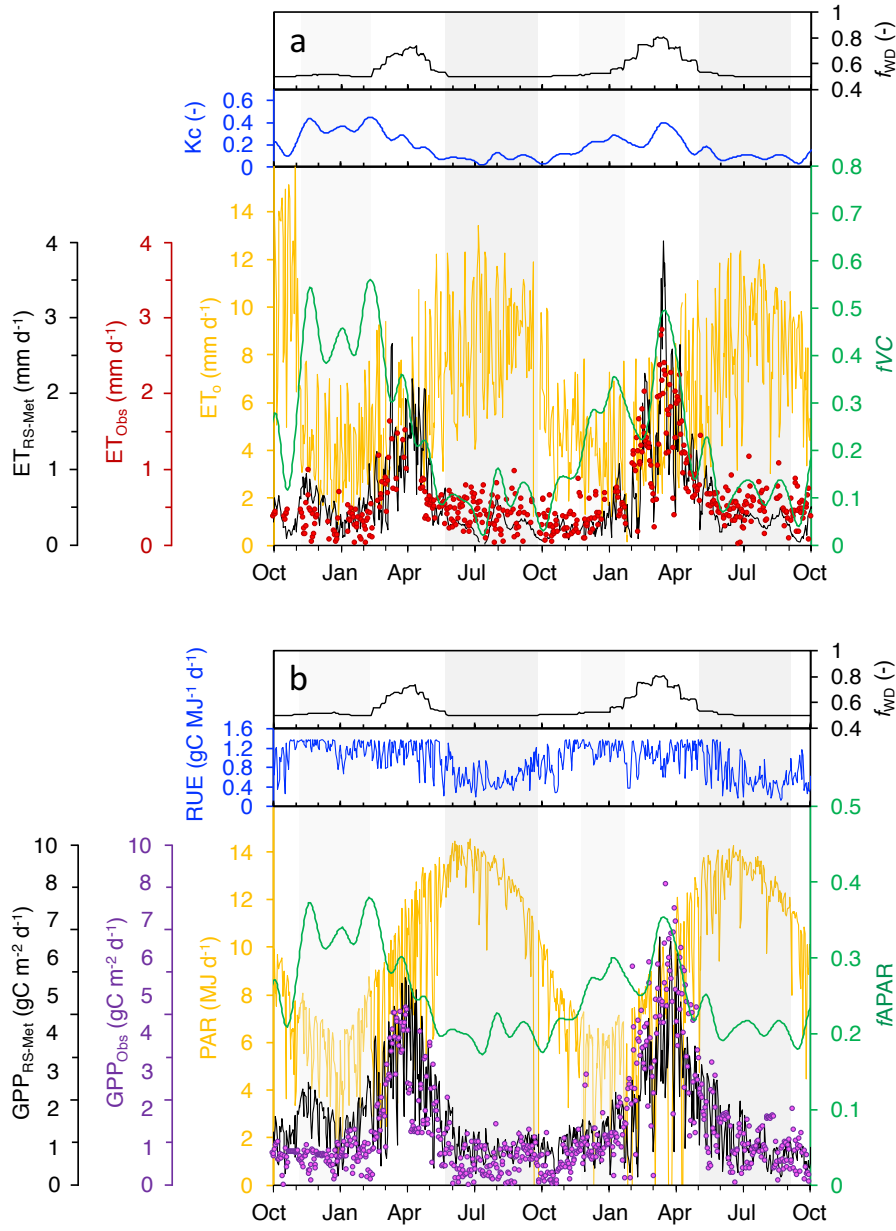

**Fig. 2.** Seasonal evolution of the water deficit factor ( $f_{WD}$ ; black line in upper panel) and the main drivers of the modeled ET (**a**) and GPP (**b**) at the semiarid pine forest of Yatir ( $ET_{RS-Met}$  and  $GPP_{RS-Met}$ , respectively; black line in lower panel) for the seasonal years 2008/9 and 2009/10. EC fluxes are also shown ( $ET_{Obs}$  and  $GPP_{Obs}$ , red and purple dots, respectively). The  $K_C$  and the radiation use efficiency (RUE) both without the addition of the  $f_{WD}$  (blue in middle panels) are shown together with the potential ET ( $ET_0$ ; yellow in **a**), the fraction of vegetation cover ( $f_{VC}$ ; green in **a**), the photosynthetic active radiation (PAR; yellow in **b**), and the fraction of absorbed PAR ( $f_{APAR}$ ; green in **b**). Colored vertical bands indicate the critical periods when the addition of  $f_{WD}$  is particularly useful.

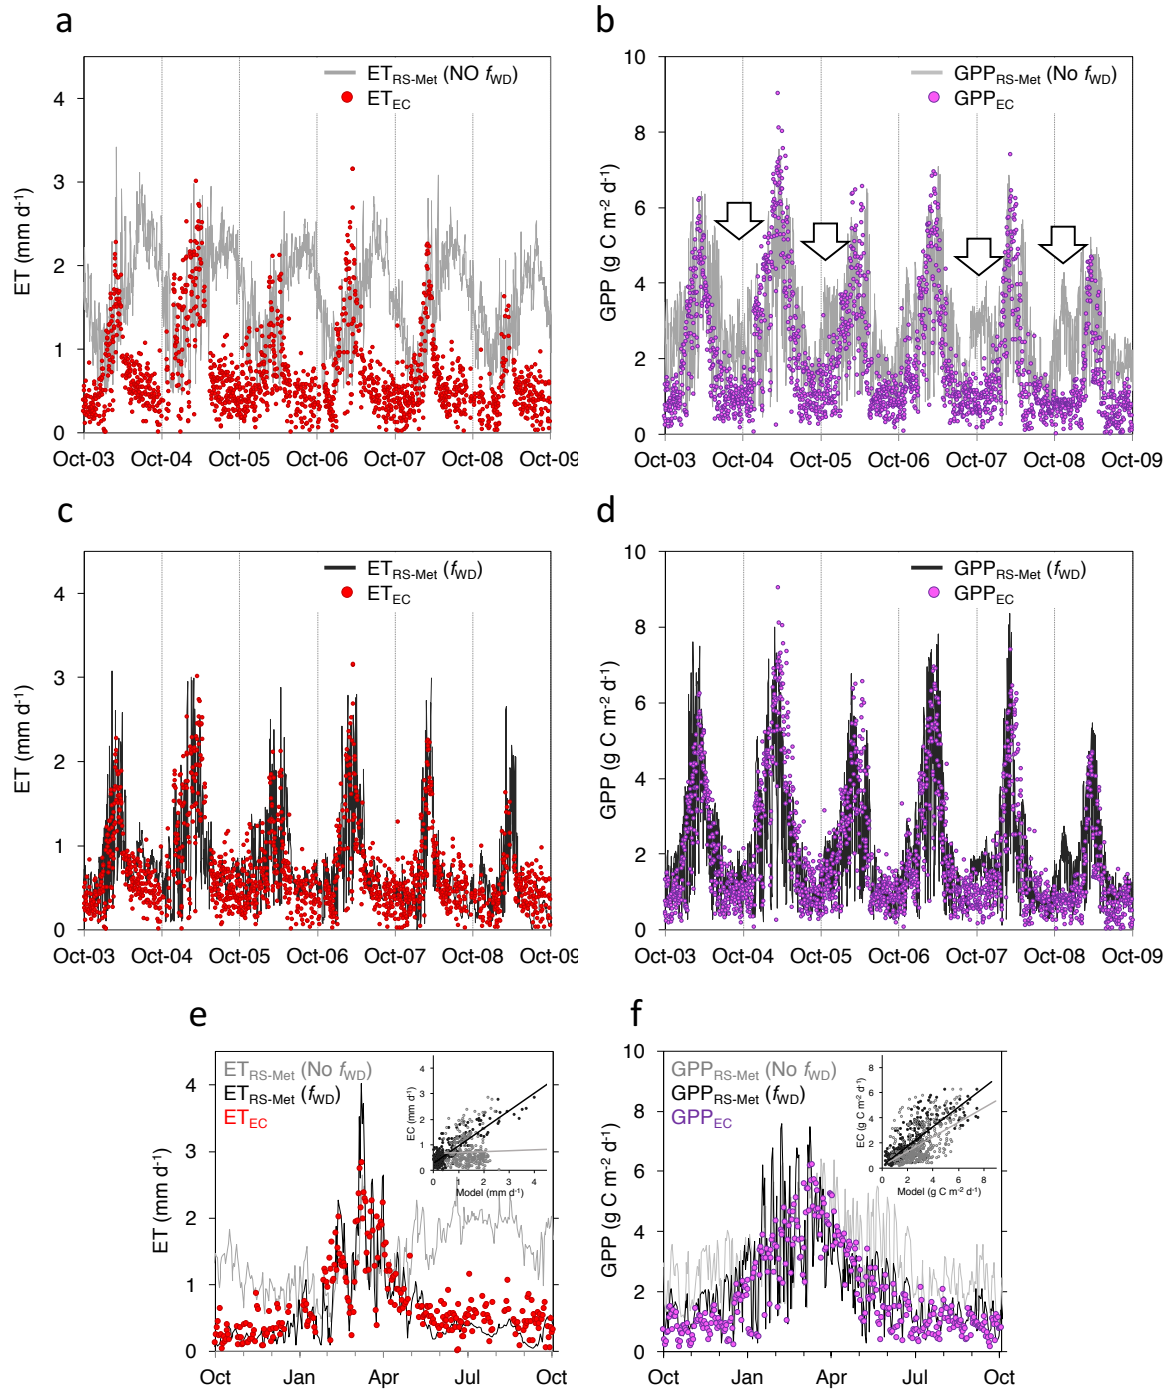

**Fig. 3.** Observed (EC) and modeled (RS-Met) ET and GPP at Yatir. Shown in (a – d) are the RS-Met with (black) and without (grey) the water deficit factor ( $f_{WD}$ ). Closer look at selected years 2009/10 and 2003/4 are shown in (e) and (f), respectively. Inserts show the correlations between modeled and observed fluxes with and without the  $f_{WD}$  (black and grey dots, respectively).



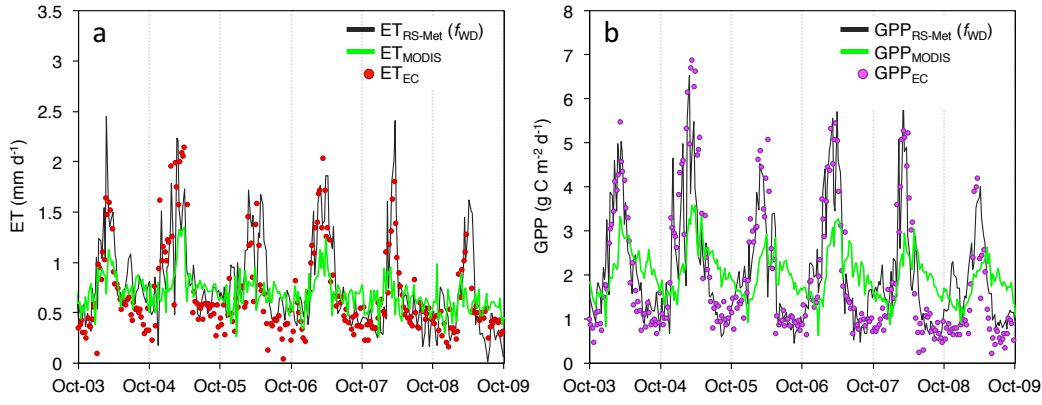

**Fig. 4.** Eight-day averaged values of ET **(a)** and GPP **(b)** from EC (dots), RS-Met (black) and MODIS (green) at Yatir. The  $R$  of the correlation for EC vs. RS-Met is 0.78 and 0.80 for ET and GPP, respectively (slope = 0.90 and 0.70; intercept = 0.19 and 0.66 for ET and GPP, respectively). The  $R$  of the correlation for EC vs. MODIS is 0.47 and 0.60 for ET and GPP, respectively (slope = 0.21 and 0.27; intercept = 0.56 and 1.47 for ET and GPP, respectively).

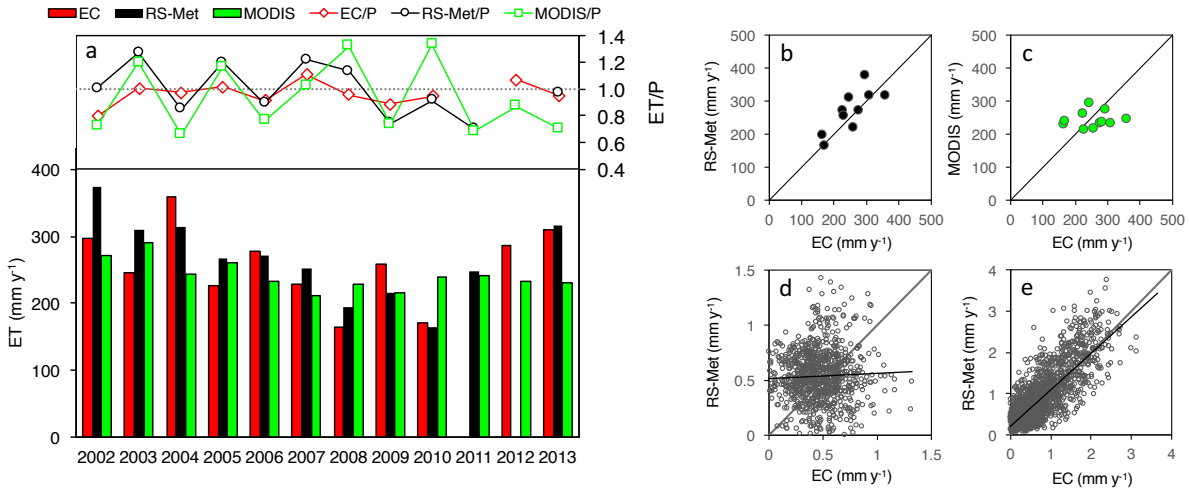

**Fig. 5.** Annual ET ( $\text{mm y}^{-1}$ ) summed from daily RS-Met (with  $f_{\text{WD}}$ ; black), MODIS (green) and EC (red) at Yatir forest site for 2003-2014 **(a)**. Linear regressions of the EC vs. RS-Met **(b)** and EC vs. MODIS **(c)**. Daily estimates from RS-Met in dry summer (June-August; **d**) and rainy (October-May; **e**) seasons. The  $R^2$ s of the linear fits for EC vs. RS-Met **(b)** and MODIS **(c)** are 0.78 ( $P < 0.05$ ;  $N = 10$ ) and 0.10 ( $P > 0.1$ ;  $N = 11$ ), respectively. The  $R^2$ s of the linear fits for the daily data in **(d)** and **(e)** are 0.05 ( $P > 0.1$ ;  $N = 876$ ) and 0.80 ( $P < 0.0001$ ;  $N = 1570$ ), respectively. The interannual trends in ET/P from EC, RS-Met and MODIS are presented in the upper panel of **(a)**. Note that the annual sums of ET from EC and RS-Met in 2012 and 2013, respectively, are not displayed due to the scarcity of available data during these years ( $> 50\%$  missing data).

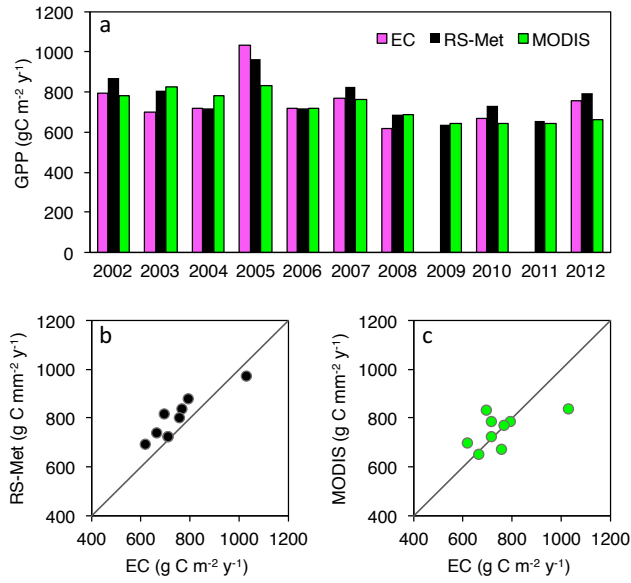

**Fig. 6.** Annual GPP sums ( $\text{g C m}^{-2} \text{ y}^{-1}$ ) from EC, RS-Met (with  $f_{\text{WD}}$ ) and the 8-day MOD16 product (MODIS) at Yatir **(a)**; and the linear regressions of EC vs. RS-Met **(b)** and MODIS **(c)**. The  $R$  of the linear fits is 0.91 ( $P < 0.05$ ;  $N = 10$ ) and 0.58 ( $P = 0.08$ ;  $N = 10$ ) for RS-Met and MODIS, respectively. Annual EC GPP for 2009 and 2011 were not calculated due to missing data.

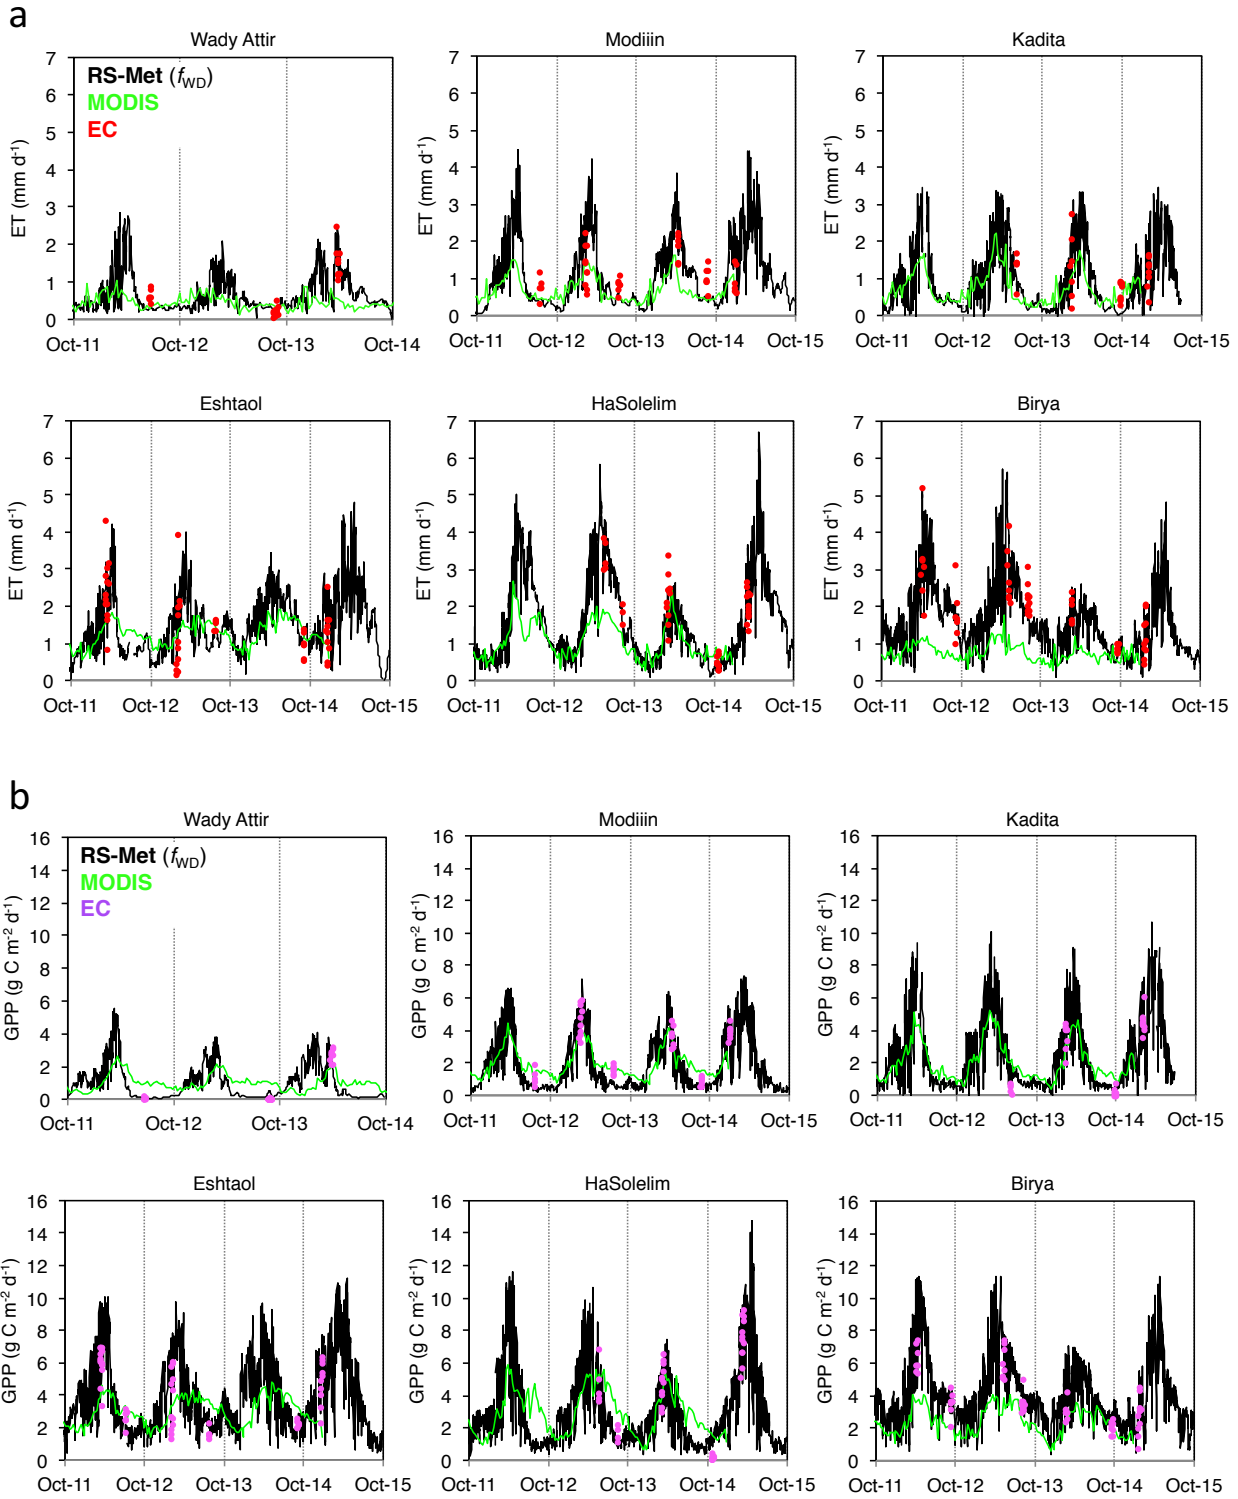

**Fig. 7.** ET (**a**) and GPP (**b**) from EC, RS-Met (with  $f_{WD}$ ) and MODIS (MOD16A2 and MOD17A2 products, respectively) at the six forest and non-forested sites.



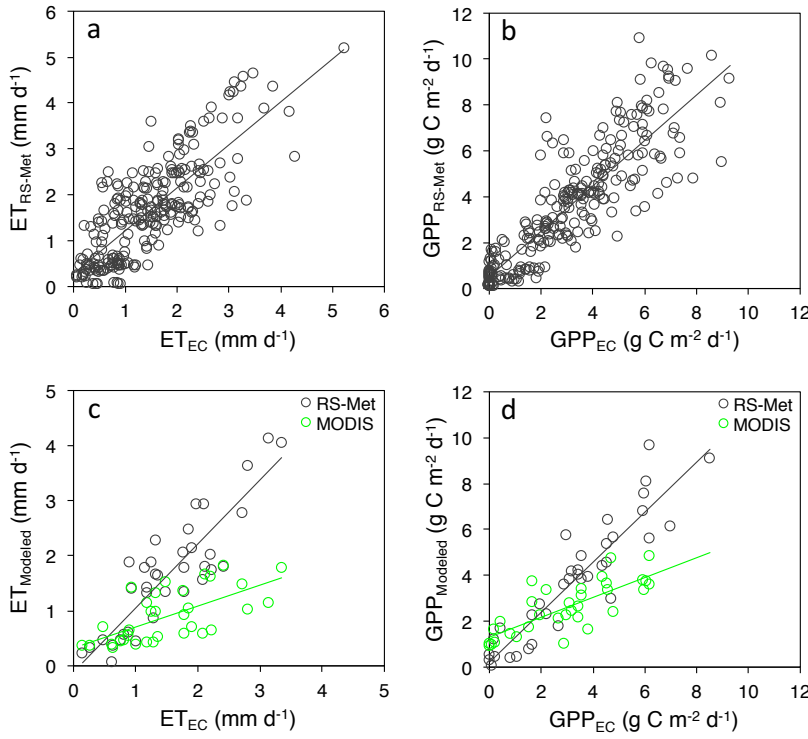

**Fig. 8.** Cross-site EC vs. model correlations of ET (**a**, **c**) and GPP (**b**, **d**). In (**a**) and (**b**) are the EC vs. RS-Met (with  $f_{WD}$ ) using all EC data from the six sites (each dot representing a single date), with linear fits of  $ET_{RS-Met} = 0.936 ET_{EC} + 0.281$  ( $R = 0.82$ ;  $P < 0.0001$ ;  $N = 243$ ) and  $GPP_{RS-Met} = 0.990 GPP_{EC} + 0.515$  ( $R = 0.86$ ;  $P < 0.0001$ ;  $N = 252$ ) for ET and GPP, respectively. In (**c**) and (**d**) are the same cross-site correlations but with data averaged over 8-day periods for comparisons with MODIS ET and GPP products (8-day averaged values). Linear fits for EC vs. RS-Met and MODIS in (**c**) are  $ET_{RS-Met} = 1.16 ET_{EC} - 0.11$  ( $R = 0.88$ ;  $P < 0.0001$ ;  $N = 36$ ) and  $ET_{MODIS} = 0.38 ET_{EC} + 0.33$  ( $R = 0.65$ ;  $P < 0.0001$ ;  $N = 33$ ), respectively. In (**d**), linear fits are  $GPP_{RS-Met} = 1.09 GPP_{EC} + 0.21$  ( $R = 0.92$ ;  $P < 0.0001$ ;  $N = 36$ ) and  $GPP_{MODIS} = 0.43 GPP_{EC} + 1.31$  ( $R = 0.77$ ;  $P < 0.0001$ ;  $N = 33$ ) for EC vs. RS-Met and MODIS, respectively.

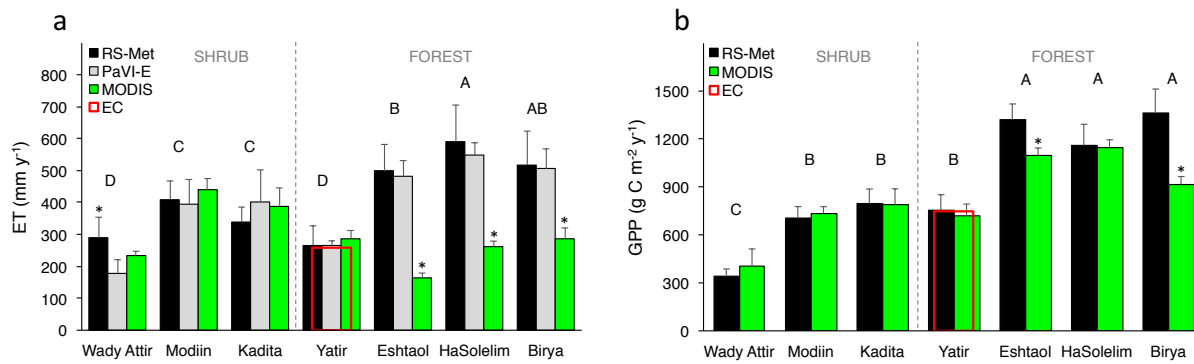

**Fig. 9.** Mean annual (2003-2013) estimates of ET **(a)** and GPP **(b)** from RS-Met (black), MODIS (green) and PaVI-E (grey; only for ET in **a**; Helman *et al.*, 2015a) at the seven sites. *Uppercase* letters indicate significant differences at  $P < 0.05$  between sites from Tukey HSD separation procedure following two-way ANOVA for the interaction of site  $\times$  model (using PaVI-E and RS-Met in **a** and MODIS and RS-Met in **b**). Asterisks indicate significant different values from other models for the specific site, as indicated by Tukey HSD. The EC annual sums at Yatir are also shown (red).

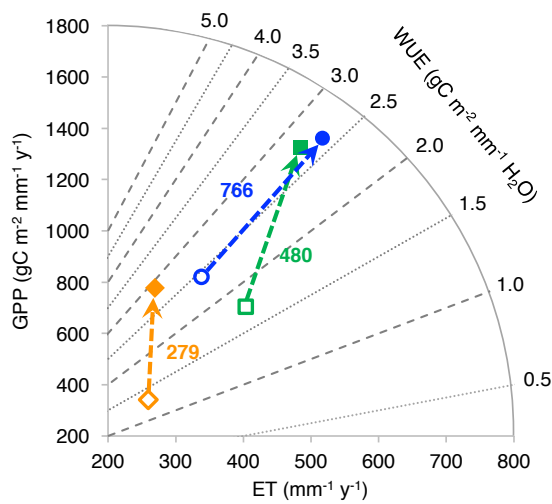

**Fig. 10.** The change in GPP, ET and water use efficiency (WUE; as indicated by the direction of the arrow) attributed to the afforestation (closed symbols) of shrubland areas (open symbols) across a rainfall gradient in Israel (279-766 mm y<sup>-1</sup>). The three-paired forest and non-forest sites of Yatir-Wady Attir, Eshtaol-Modiin and Birya-Kadita are indicated with yellow, green and blue colors, respectively. The rainfall level at each paired site is indicated near the arrow (in mm y<sup>-1</sup>). Note the changing slope of the change in ET and GPP, indicating that the gain in WUE due to afforestation decreases from dry to humid areas.

*Supplement of*

**A remote sensing-based biophysical model for daily estimations of  
evapotranspiration and CO<sub>2</sub> uptake in high-energy water-limited environments**

**D. Helman *et al.***

*Correspondence to:* D. Helman (davidhelman.biu@gmail.com)

## Figures

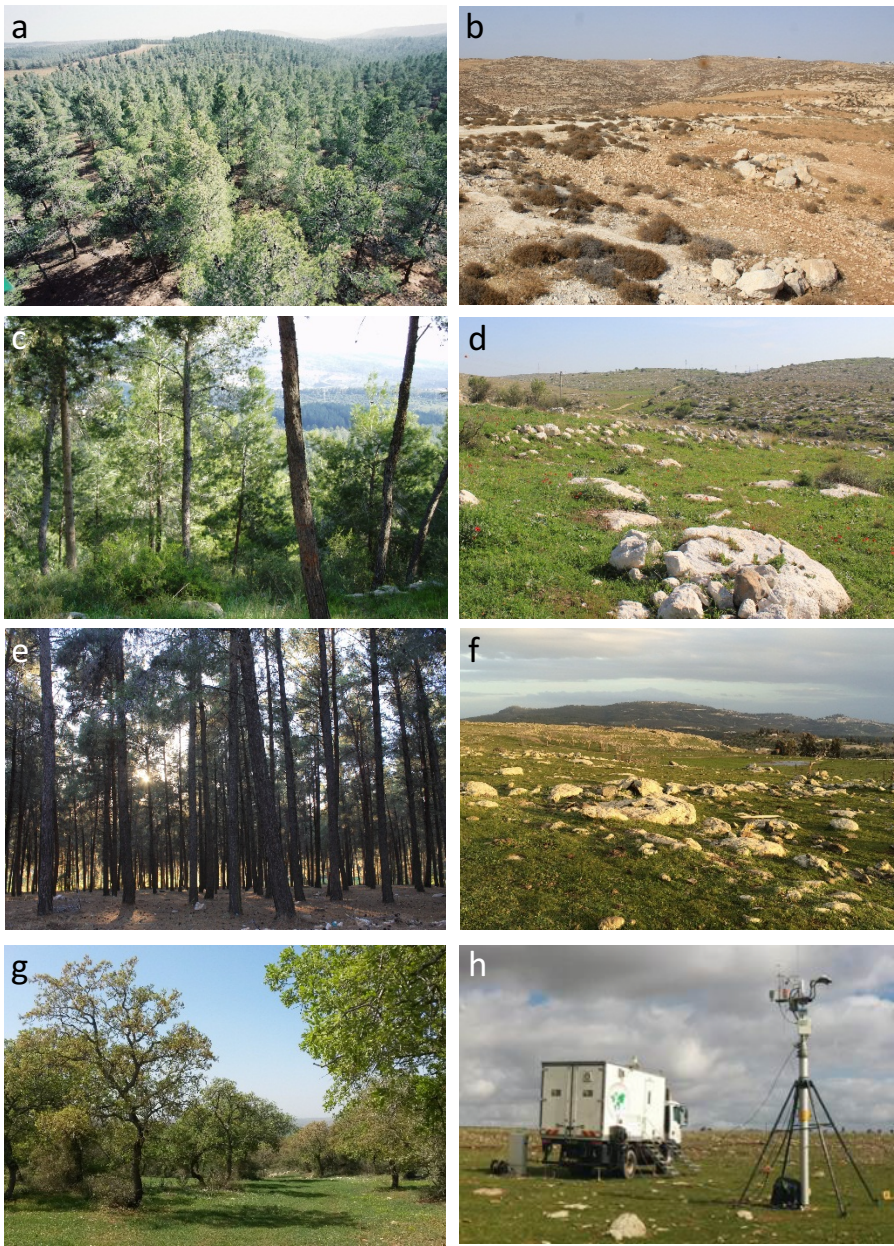

**Fig. S1.** Views of the seven study sites along the climatic gradient (**a – g**) and the newly mobile flux measurement system used in this study (**h**). This figure is the same as Fig. 1 in main article.

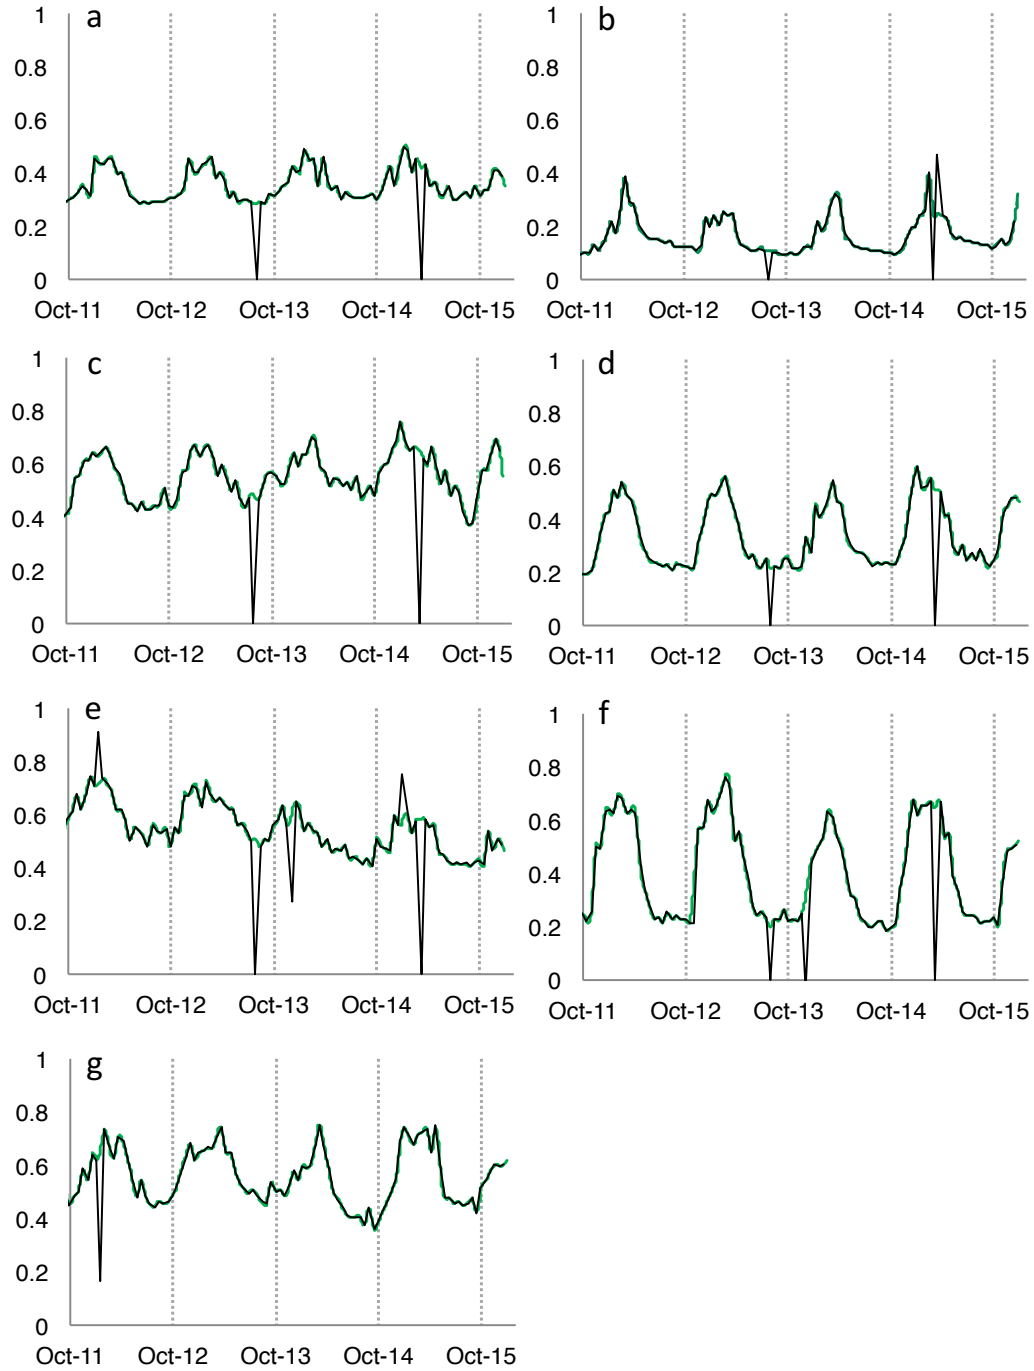

**Fig. S2.** Original (black line) and smoothed (green line) time series of NDVI (MOD13Q1) in the seven sites (see sites in Fig. S1 and respective locations in Table 1 in the main article). Smoothing and interpolation of the 16-day data to daily values was achieved using local weighted scatterplot smoothing technique (LOESS). The elimination of outliers by LOESS is clearly seen in the time series of all sites.

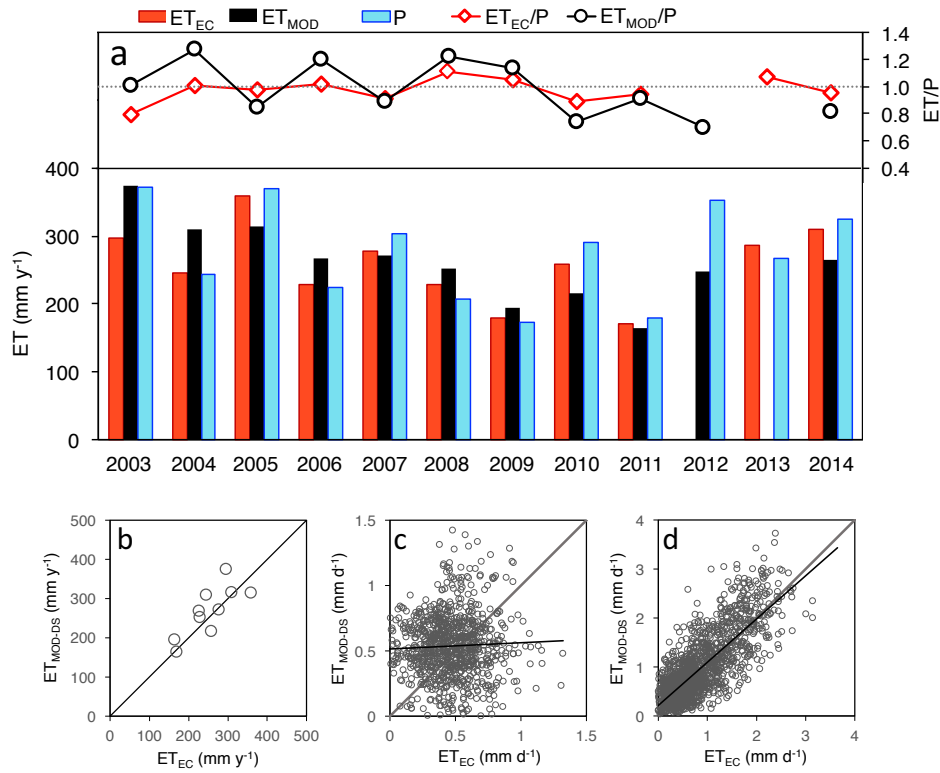

**Fig. S3.** Annual ET ( $\text{mm y}^{-1}$ ) summed from daily RS-Met estimates (with  $f_{\text{WD}}$ ) and EC, and annual rainfall amounts (P) at Yatir pine forest site for 2003-2014 **(a)**. Linear EC vs. RS-Met ET regressions of the annual **(b)** and daily estimates during dry summer (June-August; **c**) and rainy (October-May; **d**) seasons. The  $R^2$ 's of the linear fits are 0.78 ( $P < 0.05$ ;  $N = 10$ ) in **(b)**, 0.05 ( $P > 0.1$ ;  $N = 876$ ) in **(c)** and 0.80 ( $P < 0.0001$ ;  $N = 1570$ ) in **(d)**. The interannual trends in ET/P from EC and RS-Met are presented in upper panel of **(a)**. Note that annual sums of ET from EC and RS-Met in 2012 and 2013, respectively, are not displayed due to the scarcity of available data during these years ( $> 50\%$  missing data).



a

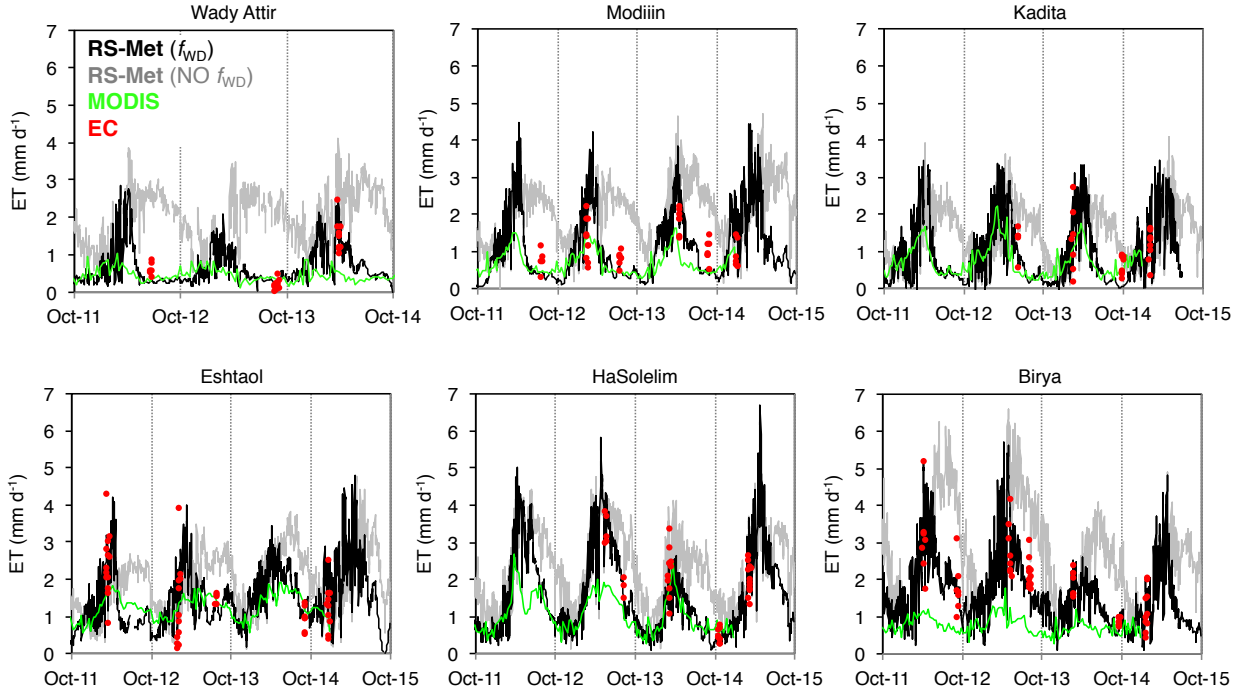

b

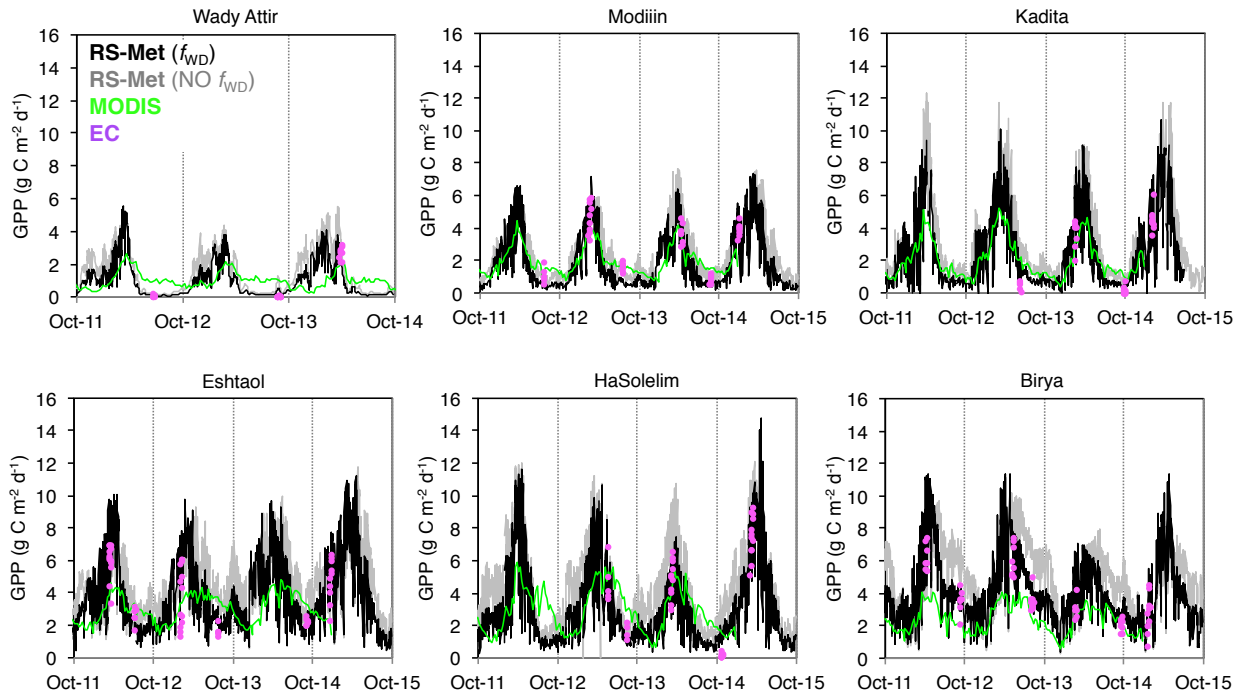

**Fig. S4.** Same as Fig. 7 in main article with the addition of RS-Met without the  $f_{WD}$  (grey line).



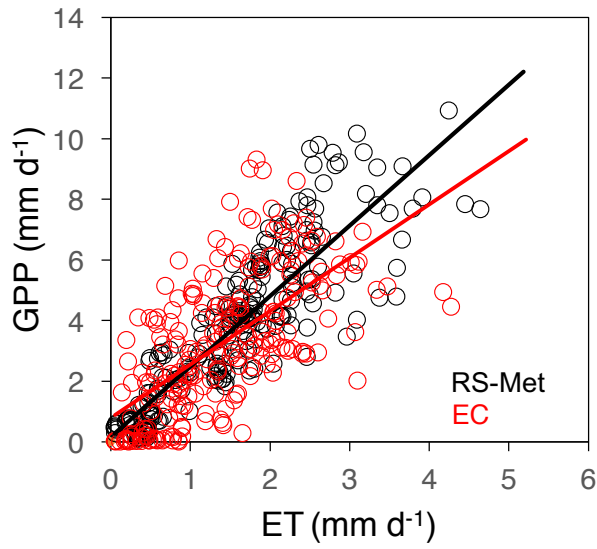

**Fig. S5.** Cross-site correlations between eddy ET and GPP from EC (red) and RS-Met (black). The RS-Met with the water deficit factor ( $f_{WD}$ ) is shown. The slopes of the linear fits in are  $2.32 \text{ g C kg}^{-1} \text{ H}_2\text{O}$  and  $1.76 \text{ g C kg}^{-1} \text{ H}_2\text{O}$  for RS-Met and EC, with  $R = 0.87$  and  $0.65$  ( $P < 0.0001$ ;  $N = 243$  for both), respectively.
